# Supplementary material for: Iodination of anilines and phenols with 18-crown-6 supported ICl2−
Source: Royal Society of Chemistry journal article supplement (doi:10.1039/c0ob00926a), 2011-01-01

## Supporting Information

# Iodination of anilines and phenols with 18-crown-6 supported $\text{ICl}_2^-$

Hannah W. Mbatia,<sup>a</sup> Olbelina Ulloa,<sup>a</sup> Daniel P. Kennedy,<sup>a</sup> Christopher D. Incarvito<sup>b</sup> and Shawn C. Burdette<sup>a,\*</sup>

<sup>a</sup> Department of Chemistry, University of Connecticut, Storrs, CT 06269-

3060, USA. E-mail: shawn.burdette@uconn.edu

<sup>b</sup> Department of Chemistry, Yale University, 225 Prospect Street, P. O. Box 208107, New Haven, CT 06520-8107, USA

|      |                                    |         |
|------|------------------------------------|---------|
| I.   | Additional Spectroscopic Data..... | S2-S3   |
| II.  | Complete X-ray Report.....         | S4-S25  |
| III. | NMR of Products.....               | S26-S45 |

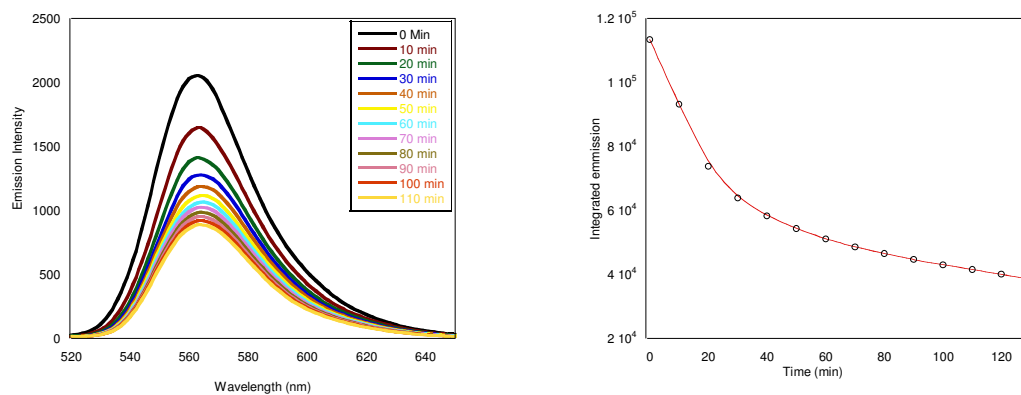

**Fig S-1** Changes in fluorescence emission at 5 μM 2, 7-dichlorofluorescein in CH<sub>3</sub>CN after the addition of 30 μM {[K.18-C-6]Cl<sub>2</sub>}<sub>n</sub> and 10 μM Et<sub>3</sub>N (left). Fluorescence response versus time obtained by integrating the emission spectra between 520-650 nm (right).

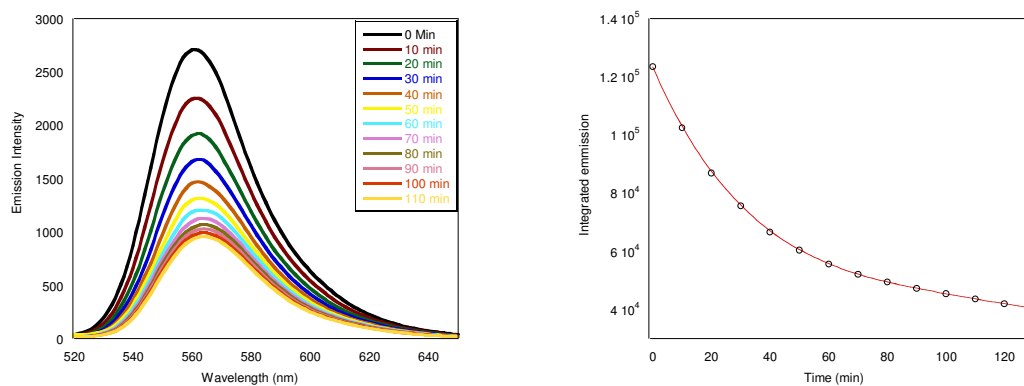

**Fig S-2** Changes in fluorescence emission at 10 $\mu$ M 2, 7-dichlorofluorescein in CH<sub>3</sub>CN after the addition of 15 $\mu$ M {[K.18-C-6]Cl<sub>2</sub>} and 10 $\mu$ M Et<sub>3</sub>N (left). Fluorescence response versus time obtained by integrating the emission spectra between 520-650 nm (right).

## Crystallographic information

### Data Collection

A yellow block crystal of  $\text{IKCl}_2\text{O}_6\text{C}_{12}\text{H}_{24}$  having approximate dimensions of 0.25 x 0.10 x 0.10 mm was mounted on a glass fiber. All measurements were made on a Rigaku Mercury2 CCD area detector with graphite monochromated Mo-K $\alpha$  radiation. Indexing was performed from 6 images that were exposed for 10.0 seconds. The crystal-to-detector distance was 49.90 mm. Cell constants and an orientation matrix for data collection corresponded to a primitive monoclinic cell with dimensions:

$$a = 8.8860(9) \text{ \AA}$$

$$b = 8.1987(8) \text{ \AA}$$

$$\beta = 101.873(2)^\circ$$

$$c = 13.9274(13) \text{ \AA}$$

$$V = 992.96(16) \text{ \AA}^3$$

For  $Z = 2$  and F.W. = 501.23, the calculated density is 1.676 g/cm<sup>3</sup>. The systematic absences of:

$$h0l: h+l \pm 2n$$

$$0k0: k \pm 2n$$

Uniquely determine the space group to be:

$$P2_1/n \text{ (#14)}$$

The data were collected at a temperature of  $-50 \pm 1^\circ\text{C}$  to a maximum  $2\theta$  value of  $55.0^\circ$ . A total of 540 oscillation images were collected. A sweep of data was done using  $\omega$  scans from  $-120.0$  to  $60.0^\circ$  in  $1.0^\circ$  step, at  $\chi=54.0^\circ$  and  $\phi = 0.0^\circ$ . The exposure rate was 30.0 [sec./ $^\circ$ ]. The detector swing angle was  $-28.40^\circ$ . A second sweep was performed using  $\omega$  scans from  $-120.0$  to  $60.0^\circ$  in  $1.0^\circ$  step, at  $\chi=54.0^\circ$  and  $\phi = 120.0^\circ$ . The exposure rate was 30.0 [sec./ $^\circ$ ]. The detector swing angle was  $-28.40^\circ$ . Another sweep was performed using  $\omega$  scans from  $-120.0$  to  $60.0^\circ$  in  $1.0^\circ$  step, at  $\chi=54.0^\circ$  and  $\phi = 240.0^\circ$ . The exposure rate was 30.0 [sec./ $^\circ$ ]. The detector swing angle was  $-28.40^\circ$ . The crystal-to-detector distance was 49.90 mm. Readout was performed in the 0.146 mm pixel mode.

Data Reduction Of the 10037 reflections that were collected, 2272 were unique ( $R_{int} = 0.035$ ). Data were collected and processed using CrystalClear (Rigaku). Net intensities and sigmas were derived as follows:

$$F^2 = [\sum(P_i - mB_{ave})] \cdot Lp^{-1}$$

where  $P_i$  is the value in counts of the  $i^{th}$  pixel

$m$  is the number of pixels in the integration area

$B_{ave}$  is the background average

$Lp$  is the Lorentz and polarization factor

$$B_{ave} = \sum(B_j)/n$$

where  $n$  is the number of pixels in the background area

$B_j$  is the value of the  $j^{th}$  pixel in counts

$$\sigma^2(F^2_{hkl}) = [(\sum P_i) + m((\sum(B_{ave} - B_j)^2)/(n-1))] \cdot Lp \cdot \text{errmul} + (\text{erradd} \cdot F^2)^2$$

where  $\text{erradd} = 0.00$

$\text{errmul} = 1.00$  The linear absorption coefficient,  $\mu$ , for Mo-K $\alpha$  radiation is 21.121 cm<sup>-1</sup>. An empirical absorption correction was applied which resulted in transmission factors ranging from 0.704 to 0.810. The data were corrected for Lorentz and polarization effects.

### Structure Solution and Refinement

The structure was solved by direct methods<sup>2</sup> and expanded using Fourier techniques<sup>3</sup>. The non-hydrogen atoms were refined anisotropically. Hydrogen atoms were refined using the riding model. The final cycle of full-matrix least-squares refinement<sup>4</sup> on  $F^2$  was based on 2271 observed reflections and 104 variable parameters and converged (largest parameter shift was 0.00 times its esd) with unweighted and weighted agreement factors of:

$$R1 = \sum ||Fo| - |Fc|| / \sum |Fo| = 0.0344$$

$$wR2 = [ \sum ( w (Fo^2 - Fc^2)^2 ) / \sum w(Fo^2)^2 ]^{1/2} = 0.0600$$

The standard deviation of an observation of unit weight<sup>5</sup> was 1.12. Unit weights were used. The maximum and minimum peaks on the final difference Fourier map corresponded to 0.32 and -0.38 e<sup>-</sup>/Å<sup>3</sup>, respectively. Neutral atom scattering factors were taken from Cromer and Waber<sup>6</sup>. Anomalous dispersion effects were included in Fcalc<sup>7</sup>; the values for Δf' and Δf'' were those of Creagh and McAuley<sup>8</sup>. The values for the mass attenuation coefficients are those of Creagh and Hubbell<sup>9</sup>. All calculations were performed using the CrystalStructure<sup>10</sup> crystallographic software package except for refinement, which was performed using SHELXL-97<sup>11</sup>.

### References

(1) CrystalClear: Rigaku Corporation, 1999. CrystalClear Software User's Guide, Molecular Structure Corporation, (c) 2000. J.W. Pflugrath (1999) Acta Cryst. D55, 1718-1725.

(2) SIR92: Altomare, A., Cascarano, G., Giacovazzo, C., Guagliardi, A., Burla, M., Polidori, G., and Camalli, M. (1994) J. Appl. Cryst., 27, 435.

(3) DIRDIF99: Beurskens, P.T., Admiraal, G., Beurskens, G., Bosman, W.P., de Gelder, R., Israel, R. and Smits, J.M.M. (1999). The DIRDIF-99 program system, Technical Report of the Crystallography Laboratory, University of Nijmegen, The Netherlands.

(4) Least Squares function minimized: (SHELXL97)

$$\sum w(F_o^2 - F_c^2)^2 \quad \text{where } w = \text{Least Squares weights.}$$

(5) Standard deviation of an observation of unit weight:

$$[\sum w(F_o^2 - F_c^2)^2 / (N_o - N_v)]^{1/2}$$

where: N<sub>o</sub> = number of observations, N<sub>v</sub> = number of variables

(6) Cromer, D. T. & Waber, J. T.; "International Tables for X-ray Crystallography", Vol. IV, The Kynoch Press, Birmingham, England, Table 2.2 A (1974).

(7) Ibers, J. A. & Hamilton, W. C.; Acta Crystallogr., 17, 781 (1964).

(8) Creagh, D. C. & McAuley, W.J. ; "International Tables for Crystallography", Vol C, (A.J.C. Wilson, ed.), Kluwer Academic Publishers, Boston, Table 4.2.6.8, pages 219-222 (1992).

(9) Creagh, D. C. & Hubbell, J.H.; "International Tables for Crystallography", Vol C, (A.J.C. Wilson, ed.), Kluwer Academic Publishers, Boston, Table 4.2.4.3, pages 200-206 (1992).

(10) CrystalStructure 3.8: Crystal Structure Analysis Package, Rigaku and Rigaku Americas (2000-2007). 9009 New Trails Dr. The Woodlands TX 77381 USA.

(11) SHELX97: Sheldrick, G.M. (1997).

## EXPERIMENTAL DETAILS

### A. Crystal Data

|                         |                                                                                                                                                             |
|-------------------------|-------------------------------------------------------------------------------------------------------------------------------------------------------------|
| Empirical Formula       | $\text{KCl}_2\text{O}_6\text{C}_{12}\text{H}_{24}$                                                                                                          |
| Formula Weight          | 501.23                                                                                                                                                      |
| Crystal Color, Habit    | yellow, block                                                                                                                                               |
| Crystal Dimensions      | 0.25 X 0.10 X 0.10 mm                                                                                                                                       |
| Crystal System          | monoclinic                                                                                                                                                  |
| Lattice Type            | Primitive                                                                                                                                                   |
| Indexing Images         | 6 images @ 10.0 seconds                                                                                                                                     |
| Detector Position       | 49.90 mm                                                                                                                                                    |
| Pixel Size              | 0.146 mm                                                                                                                                                    |
| Lattice Parameters      | $a = 8.8860(9) \text{ \AA}$<br>$b = 8.1987(8) \text{ \AA}$<br>$c = 13.9274(13) \text{ \AA}$<br>$\beta = 101.873(2)^\circ$<br>$V = 992.96(16) \text{ \AA}^3$ |
| Space Group             | $P2_1/n$ (#14)                                                                                                                                              |
| Z value                 | 2                                                                                                                                                           |
| $D_{\text{calc}}$       | $1.676 \text{ g/cm}^3$                                                                                                                                      |
| $F_{000}$               | 500.00                                                                                                                                                      |
| $\mu(\text{MoK}\alpha)$ | $21.121 \text{ cm}^{-1}$                                                                                                                                    |

### B. Intensity Measurements



|                                                        |                                                                            |
|--------------------------------------------------------|----------------------------------------------------------------------------|
| Diffractometer                                         | Rigaku SCXmini                                                             |
| Radiation                                              | MoK $\alpha$ ( $\lambda = 0.71075 \text{ \AA}$ )<br>graphite monochromated |
| Detector Aperture                                      | 75 mm round                                                                |
| Data Images                                            | 540 exposures                                                              |
| $\omega$ oscillation Range ( $\chi=54.0, \phi=0.0$ )   | -120.0 - 60.0 $^{\circ}$                                                   |
| Exposure Rate                                          | 30.0 sec./ $^{\circ}$                                                      |
| Detector Swing Angle                                   | -28.40 $^{\circ}$                                                          |
| $\omega$ oscillation Range ( $\chi=54.0, \phi=120.0$ ) | -120.0 - 60.0 $^{\circ}$                                                   |
| Exposure Rate                                          | 30.0 sec./ $^{\circ}$                                                      |
| Detector Swing Angle                                   | -28.40 $^{\circ}$                                                          |
| $\omega$ oscillation Range ( $\chi=54.0, \phi=240.0$ ) | -120.0 - 60.0 $^{\circ}$                                                   |
| Exposure Rate                                          | 30.0 sec./ $^{\circ}$                                                      |
| Detector Swing Angle                                   | -28.40 $^{\circ}$                                                          |
| Detector Position                                      | 49.90 mm                                                                   |
| Pixel Size                                             | 0.146 mm                                                                   |
| $2\theta_{\max}$                                       | 55.0 $^{\circ}$                                                            |
| No. of Reflections Measured                            | Total: 10037<br>Unique: 2271 ( $R_{\text{int}} = 0.035$ )                  |
| Corrections                                            | Lorentz-polarization<br>Absorption<br>(trans. factors: 0.704 - 0.810)      |

### C. Structure Solution and Refinement

|                                       |                                                                                                                        |
|---------------------------------------|------------------------------------------------------------------------------------------------------------------------|
| Structure Solution                    | Direct Methods (SIR92)                                                                                                 |
| Refinement                            | Full-matrix least-squares on $F^2$                                                                                     |
| Function Minimized                    | $\Sigma w (F_o^2 - F_c^2)^2$                                                                                           |
| Least Squares Weights                 | $w = 1 / [ \sigma^2(F_o^2) + (0.0198 \cdot P)^2 + 0.4172 \cdot P ]$<br>where $P = (\text{Max}(F_o^2, 0) + 2F_c^2) / 3$ |
| $2\theta_{\text{max}}$ cutoff         | 55.0°                                                                                                                  |
| Anomalous Dispersion                  | All non-hydrogen atoms                                                                                                 |
| No. Observations (All reflections)    | 2271                                                                                                                   |
| No. Variables                         | 104                                                                                                                    |
| Reflection/Parameter Ratio            | 21.84                                                                                                                  |
| Residuals: R1 ( $I > 2.00\sigma(I)$ ) | 0.0344                                                                                                                 |
| Residuals: R (All reflections)        | 0.0576                                                                                                                 |
| Residuals: wR2 (All reflections)      | 0.0600                                                                                                                 |
| Goodness of Fit Indicator             | 1.124                                                                                                                  |
| Max Shift/Error in Final Cycle        | 0.000                                                                                                                  |
| Maximum peak in Final Diff. Map       | 0.32 e <sup>-</sup> /Å <sup>3</sup>                                                                                    |
| Minimum peak in Final Diff. Map       | -0.38 e <sup>-</sup> /Å <sup>3</sup>                                                                                   |

Table 1. Atomic coordinates and  $B_{iso}/B_{eq}$  and occupancy

| atom  | x           | y           | z           | $B_{eq}$ | occ |
|-------|-------------|-------------|-------------|----------|-----|
| I(1)  | 1.0000      | 1.0000      | 1.0000      | 3.064(7) | 1/2 |
| K(1)  | 1.0000      | 0.5000      | 1.0000      | 3.42(5)  | 1/2 |
| Cl(1) | 0.78515(11) | 0.81836(12) | 1.03276(8)  | 5.53(2)  |     |
| O(1)  | 0.7229(2)   | 0.3920(2)   | 1.0415(2)   | 5.20(5)  |     |
| O(2)  | 0.7703(2)   | 0.3798(2)   | 0.85012(18) | 5.21(5)  |     |
| O(3)  | 1.0219(3)   | 0.5552(2)   | 0.80380(18) | 5.36(5)  |     |
| C(1)  | 0.6267(4)   | 0.2998(5)   | 0.9678(4)   | 7.45(13) |     |
| C(2)  | 0.6208(4)   | 0.3824(5)   | 0.8733(4)   | 7.63(14) |     |
| C(3)  | 0.7737(6)   | 0.4425(5)   | 0.7553(3)   | 7.92(15) |     |
| C(4)  | 0.9341(7)   | 0.4371(5)   | 0.7414(2)   | 7.80(14) |     |
| C(5)  | 1.1768(6)   | 0.5590(5)   | 0.7920(3)   | 7.56(13) |     |
| C(6)  | 1.2633(5)   | 0.6753(5)   | 0.8634(4)   | 7.16(12) |     |

$$B_{eq} = 8/3 \pi^2 (U_{11}(aa^*)^2 + U_{22}(bb^*)^2 + U_{33}(cc^*)^2 + 2U_{12}(aa^*bb^*)\cos \gamma + 2U_{13}(aa^*cc^*)\cos \beta + 2U_{23}(bb^*cc^*)\cos \alpha)$$

Table 2. Atomic coordinates and  $B_{iso}$  involving hydrogens/ $B_{eq}$  and occupancy

| atom  | x      | y      | z      | $B_{eq}$ | occ |
|-------|--------|--------|--------|----------|-----|
| H(1)  | 0.5232 | 0.2921 | 0.9816 | 8.94     |     |
| H(2)  | 0.6677 | 0.1892 | 0.9657 | 8.94     |     |
| H(3)  | 0.5471 | 0.3268 | 0.8216 | 9.15     |     |
| H(4)  | 0.5867 | 0.4954 | 0.8772 | 9.15     |     |
| H(5)  | 0.7358 | 0.5550 | 0.7497 | 9.50     |     |
| H(6)  | 0.7075 | 0.3766 | 0.7049 | 9.50     |     |
| H(7)  | 0.9774 | 0.3282 | 0.7574 | 9.36     |     |
| H(8)  | 0.9369 | 0.4607 | 0.6728 | 9.36     |     |
| H(9)  | 1.1807 | 0.5930 | 0.7251 | 9.07     |     |
| H(10) | 1.2224 | 0.4501 | 0.8031 | 9.07     |     |
| H(11) | 1.3655 | 0.6941 | 0.8493 | 8.59     |     |
| H(12) | 1.2089 | 0.7798 | 0.8592 | 8.59     |     |

$$B_{eq} = \frac{8}{3} \pi^2 (U_{11}(aa^*)^2 + U_{22}(bb^*)^2 + U_{33}(cc^*)^2 + 2U_{12}(aa^*bb^*)\cos \gamma + 2U_{13}(aa^*cc^*)\cos \beta + 2U_{23}(bb^*cc^*)\cos \alpha)$$

Table 3. Anisotropic displacement parameters

| atom  | U <sub>11</sub> | U <sub>22</sub> | U <sub>33</sub> | U <sub>12</sub> | U <sub>13</sub> | U <sub>23</sub> |
|-------|-----------------|-----------------|-----------------|-----------------|-----------------|-----------------|
| I(1)  | 0.03465(14)     | 0.04002(15)     | 0.03962(15)     | 0.00398(14)     | 0.00269(10)     | -0.00022(15)    |
| K(1)  | 0.03(5)         | 0.0608          | 0.0347          | -0.0099         | 0.0070          | -0.0015         |
| Cl(1) | 0.0522(5)       | 0.0628(5)       | 0.0987(7)       | -0.0097(4)      | 0.0238(5)       | 0.0115(5)       |
| O(1)  | 0.0490(14)      | 0.0474(14)      | 0.109(2)        | -0.0093(11)     | 0.0355(14)      | 0.0015(14)      |
| O(2)  | 0.0574(15)      | 0.0590(15)      | 0.0656(16)      | 0.0123(12)      | -0.0250(12)     | -0.0082(12)     |
| O(3)  | 0.112(2)        | 0.0536(14)      | 0.0432(13)      | 0.0196(14)      | 0.0293(15)      | 0.0047(11)      |
| C(1)  | 0.033(2)        | 0.057(2)        | 0.194(5)        | -0.0113(18)     | 0.025(2)        | -0.020(3)       |
| C(2)  | 0.040(2)        | 0.069(3)        | 0.157(4)        | 0.013(2)        | -0.035(2)       | -0.041(3)       |
| C(3)  | 0.152(5)        | 0.056(2)        | 0.061(2)        | 0.025(2)        | -0.052(3)       | -0.0117(19)     |
| C(4)  | 0.195(6)        | 0.066(2)        | 0.034(2)        | 0.033(3)        | 0.019(3)        | 0.0005(19)      |
| C(5)  | 0.156(4)        | 0.072(2)        | 0.088(3)        | 0.043(3)        | 0.093(3)        | 0.031(2)        |
| C(6)  | 0.092(3)        | 0.058(2)        | 0.150(4)        | 0.015(2)        | 0.091(3)        | 0.033(3)        |

The general temperature factor expression:  $\exp(-2\pi^2(a^2U_{11}h^2 + b^2U_{22}k^2 + c^2U_{33}l^2 + 2a*b*U_{12}hk + 2a*c*U_{13}hl + 2b*c*U_{23}kl))$

Table 4. Bond lengths (Å)

| atom | atom  | distance   | atom | atom                | distance   |
|------|-------|------------|------|---------------------|------------|
| I(1) | Cl(1) | 2.5356(10) | I(1) | Cl(1) <sup>1)</sup> | 2.5356(10) |
| K(1) | Cl(1) | 3.3203(10) | K(1) | Cl(1) <sup>2)</sup> | 3.3203(10) |
| K(1) | O(1)  | 2.787(2)   | K(1) | O(1) <sup>2)</sup>  | 2.787(2)   |
| K(1) | O(2)  | 2.782(2)   | K(1) | O(2) <sup>2)</sup>  | 2.782(2)   |
| K(1) | O(3)  | 2.816(2)   | K(1) | O(3) <sup>2)</sup>  | 2.816(2)   |
| O(1) | C(1)  | 1.413(5)   | O(1) | C(6) <sup>2)</sup>  | 1.416(6)   |
| O(2) | C(2)  | 1.430(5)   | O(2) | C(3)                | 1.423(5)   |
| O(3) | C(4)  | 1.423(5)   | O(3) | C(5)                | 1.419(6)   |
| C(1) | C(2)  | 1.471(8)   | C(3) | C(4)                | 1.478(8)   |
| C(5) | C(6)  | 1.474(6)   |      |                     |            |

Symmetry Operators:

(1) -X+2,-Y+2,-Z+2

(2) -X+2,-Y+1,-Z+2

Table 5. Bond lengths involving hydrogens (Å)

| atom | atom  | distance | atom | atom  | distance |
|------|-------|----------|------|-------|----------|
| C(1) | H(1)  | 0.980    | C(1) | H(2)  | 0.980    |
| C(2) | H(3)  | 0.980    | C(2) | H(4)  | 0.980    |
| C(3) | H(5)  | 0.980    | C(3) | H(6)  | 0.980    |
| C(4) | H(7)  | 0.980    | C(4) | H(8)  | 0.980    |
| C(5) | H(9)  | 0.980    | C(5) | H(10) | 0.980    |
| C(6) | H(11) | 0.980    | C(6) | H(12) | 0.980    |

Table 6. Bond angles ( $^{\circ}$ )

| atom               | atom | atom               | angle      | atom               | atom  | atom               | angle      |
|--------------------|------|--------------------|------------|--------------------|-------|--------------------|------------|
| Cl(1)              | I(1) | Cl(1) <sup>1</sup> | 180.00(4)  | Cl(1)              | K(1)  | Cl(1) <sup>2</sup> | 180.00(3)  |
| Cl(1)              | K(1) | O(1)               | 70.36(5)   | Cl(1)              | K(1)  | O(1) <sup>2</sup>  | 109.64(5)  |
| Cl(1)              | K(1) | O(2)               | 91.59(5)   | Cl(1)              | K(1)  | O(2) <sup>2</sup>  | 88.41(5)   |
| Cl(1)              | K(1) | O(3)               | 99.41(5)   | Cl(1)              | K(1)  | O(3) <sup>2</sup>  | 80.59(5)   |
| Cl(1) <sup>2</sup> | K(1) | O(1)               | 109.64(5)  | Cl(1) <sup>2</sup> | K(1)  | O(1) <sup>2</sup>  | 70.36(5)   |
| Cl(1) <sup>2</sup> | K(1) | O(2)               | 88.41(5)   | Cl(1) <sup>2</sup> | K(1)  | O(2) <sup>2</sup>  | 91.59(5)   |
| Cl(1) <sup>2</sup> | K(1) | O(3)               | 80.59(5)   | Cl(1) <sup>2</sup> | K(1)  | O(3) <sup>2</sup>  | 99.41(5)   |
| O(1)               | K(1) | O(1) <sup>2</sup>  | 0(440)     | O(1)               | K(1)  | O(2)               | 60.01(7)   |
| O(1)               | K(1) | O(2) <sup>2</sup>  | 119.99(7)  | O(1)               | K(1)  | O(3)               | 119.54(8)  |
| O(1)               | K(1) | O(3) <sup>2</sup>  | 60.46(8)   | O(1) <sup>2</sup>  | K(1)  | O(2)               | 119.99(7)  |
| O(1) <sup>2</sup>  | K(1) | O(2) <sup>2</sup>  | 60.01(7)   | O(1) <sup>2</sup>  | K(1)  | O(3)               | 60.46(8)   |
| O(1) <sup>2</sup>  | K(1) | O(3) <sup>2</sup>  | 119.54(8)  | O(2)               | K(1)  | O(2) <sup>2</sup>  | 180.00(10) |
| O(2)               | K(1) | O(3)               | 61.02(7)   | O(2)               | K(1)  | O(3) <sup>2</sup>  | 118.98(7)  |
| O(2) <sup>2</sup>  | K(1) | O(3)               | 118.98(7)  | O(2) <sup>2</sup>  | K(1)  | O(3) <sup>2</sup>  | 61.02(7)   |
| O(3)               | K(1) | O(3) <sup>2</sup>  | 180.00(10) | I(1)               | Cl(1) | K(1)               | 87.79(2)   |
| K(1)               | O(1) | C(1)               | 116.6(2)   | K(1)               | O(1)  | C(6) <sup>2</sup>  | 114.0(2)   |
| C(1)               | O(1) | C(6) <sup>2</sup>  | 113.3(3)   | K(1)               | O(2)  | C(2)               | 113.4(2)   |
| K(1)               | O(2) | C(3)               | 114.6(2)   | C(2)               | O(2)  | C(3)               | 113.7(3)   |
| K(1)               | O(3) | C(4)               | 110.1(2)   | K(1)               | O(3)  | C(5)               | 112.2(2)   |
| C(4)               | O(3) | C(5)               | 111.6(3)   | O(1)               | C(1)  | C(2)               | 108.0(3)   |
| O(2)               | C(2) | C(1)               | 109.3(3)   | O(2)               | C(3)  | C(4)               | 108.4(3)   |
| O(3)               | C(4) | C(3)               | 108.8(3)   | O(3)               | C(5)  | C(6)               | 108.6(4)   |



O(1)<sup>2)</sup> C(6) C(5) 108.2(3)

Symmetry Operators:

(1) -X+2,-Y+2,-Z+2

(2) -X+2,-Y+1,-Z+2

Table 7. Bond angles involving hydrogens (°)

| atom               | atom | atom  | angle | atom               | atom | atom  | angle |
|--------------------|------|-------|-------|--------------------|------|-------|-------|
| O(1)               | C(1) | H(1)  | 110.1 | O(1)               | C(1) | H(2)  | 110.1 |
| C(2)               | C(1) | H(1)  | 110.1 | C(2)               | C(1) | H(2)  | 110.1 |
| H(1)               | C(1) | H(2)  | 108.4 | O(2)               | C(2) | H(3)  | 109.8 |
| O(2)               | C(2) | H(4)  | 109.8 | C(1)               | C(2) | H(3)  | 109.8 |
| C(1)               | C(2) | H(4)  | 109.8 | H(3)               | C(2) | H(4)  | 108.2 |
| O(2)               | C(3) | H(5)  | 110.0 | O(2)               | C(3) | H(6)  | 110.0 |
| C(4)               | C(3) | H(5)  | 110.0 | C(4)               | C(3) | H(6)  | 110.0 |
| H(5)               | C(3) | H(6)  | 108.4 | O(3)               | C(4) | H(7)  | 109.9 |
| O(3)               | C(4) | H(8)  | 109.9 | C(3)               | C(4) | H(7)  | 109.9 |
| C(3)               | C(4) | H(8)  | 109.9 | H(7)               | C(4) | H(8)  | 108.3 |
| O(3)               | C(5) | H(9)  | 110.0 | O(3)               | C(5) | H(10) | 110.0 |
| C(6)               | C(5) | H(9)  | 110.0 | C(6)               | C(5) | H(10) | 110.0 |
| H(9)               | C(5) | H(10) | 108.3 | O(1) <sup>1)</sup> | C(6) | H(11) | 110.1 |
| O(1) <sup>1)</sup> | C(6) | H(12) | 110.1 | C(5)               | C(6) | H(11) | 110.1 |
| C(5)               | C(6) | H(12) | 110.1 | H(11)              | C(6) | H(12) | 108.4 |

Symmetry Operators:

(1) -X+2,-Y+1,-Z+2

Table 8. Torsion Angles( $^{\circ}$ )

| atom1               | atom2 | atom3              | atom4              | angle      | atom1               | atom2 | atom3              | atom4              | angle     |
|---------------------|-------|--------------------|--------------------|------------|---------------------|-------|--------------------|--------------------|-----------|
| Cl(1)               | K(1)  | O(1)               | C(1)               | 117.7(2)   | Cl(1)               | K(1)  | O(1)               | C(6) <sup>1)</sup> | -107.3(2) |
| O(1)                | K(1)  | Cl(1)              | I(1)               | -179.80(6) | Cl(1)               | K(1)  | O(1) <sup>1)</sup> | C(1) <sup>1)</sup> | 62.3(2)   |
| Cl(1)               | K(1)  | O(1) <sup>1)</sup> | C(6)               | -72.7(2)   | O(1) <sup>1)</sup>  | K(1)  | Cl(1)              | I(1)               | 0.20(6)   |
| Cl(1)               | K(1)  | O(2)               | C(2)               | -45.7(2)   | Cl(1)               | K(1)  | O(2)               | C(3)               | 87.1(2)   |
| O(2)                | K(1)  | Cl(1)              | I(1)               | -122.55(5) | Cl(1)               | K(1)  | O(2) <sup>1)</sup> | C(2) <sup>1)</sup> | -134.3(2) |
| Cl(1)               | K(1)  | O(2) <sup>1)</sup> | C(3) <sup>1)</sup> | 92.9(2)    | O(2) <sup>1)</sup>  | K(1)  | Cl(1)              | I(1)               | 57.45(5)  |
| Cl(1)               | K(1)  | O(3)               | C(4)               | -109.2(2)  | Cl(1)               | K(1)  | O(3)               | C(5)               | 125.9(2)  |
| O(3)                | K(1)  | Cl(1)              | I(1)               | -61.67(6)  | Cl(1)               | K(1)  | O(3) <sup>1)</sup> | C(4) <sup>1)</sup> | -70.8(2)  |
| Cl(1)               | K(1)  | O(3) <sup>1)</sup> | C(5) <sup>1)</sup> | 54.1(2)    | O(3) <sup>1)</sup>  | K(1)  | Cl(1)              | I(1)               | 118.33(6) |
| Cl(1) <sup>1)</sup> | K(1)  | O(1)               | C(1)               | -62.3(2)   | Cl(1) <sup>1)</sup> | K(1)  | O(1)               | C(6) <sup>1)</sup> | 72.7(2)   |
| Cl(1) <sup>1)</sup> | K(1)  | O(1) <sup>1)</sup> | C(1) <sup>1)</sup> | -117.7(2)  | Cl(1) <sup>1)</sup> | K(1)  | O(1) <sup>1)</sup> | C(6)               | 107.3(2)  |
| Cl(1) <sup>1)</sup> | K(1)  | O(2)               | C(2)               | 134.3(2)   | Cl(1) <sup>1)</sup> | K(1)  | O(2)               | C(3)               | -92.9(2)  |
| Cl(1) <sup>1)</sup> | K(1)  | O(2) <sup>1)</sup> | C(2) <sup>1)</sup> | 45.7(2)    | Cl(1) <sup>1)</sup> | K(1)  | O(2) <sup>1)</sup> | C(3) <sup>1)</sup> | -87.1(2)  |
| Cl(1) <sup>1)</sup> | K(1)  | O(3)               | C(4)               | 70.8(2)    | Cl(1) <sup>1)</sup> | K(1)  | O(3)               | C(5)               | -54.1(2)  |
| Cl(1) <sup>1)</sup> | K(1)  | O(3) <sup>1)</sup> | C(4) <sup>1)</sup> | 109.2(2)   | Cl(1) <sup>1)</sup> | K(1)  | O(3) <sup>1)</sup> | C(5) <sup>1)</sup> | -125.9(2) |
| O(1)                | K(1)  | O(2)               | C(2)               | 20.5(2)    | O(1)                | K(1)  | O(2)               | C(3)               | 153.3(2)  |
| O(2)                | K(1)  | O(1)               | C(1)               | 13.8(2)    | O(2)                | K(1)  | O(1)               | C(6) <sup>1)</sup> | 148.8(2)  |
| O(1)                | K(1)  | O(2) <sup>1)</sup> | C(2) <sup>1)</sup> | 159.5(2)   | O(1)                | K(1)  | O(2) <sup>1)</sup> | C(3) <sup>1)</sup> | 26.7(2)   |
| O(2) <sup>1)</sup>  | K(1)  | O(1)               | C(1)               | -166.2(2)  | O(2) <sup>1)</sup>  | K(1)  | O(1)               | C(6) <sup>1)</sup> | -31.2(2)  |
| O(1)                | K(1)  | O(3)               | C(4)               | -36.5(3)   | O(1)                | K(1)  | O(3)               | C(5)               | -161.4(2) |

|                   |      |                   |                   |           |                   |      |                   |                   |           |
|-------------------|------|-------------------|-------------------|-----------|-------------------|------|-------------------|-------------------|-----------|
| O(3)              | K(1) | O(1)              | C(1)              | 27.9(2)   | O(3)              | K(1) | O(1)              | C(6) <sup>1</sup> | 162.8(2)  |
| O(1)              | K(1) | O(3) <sup>1</sup> | C(4) <sup>1</sup> | -143.5(3) | O(1)              | K(1) | O(3) <sup>1</sup> | C(5) <sup>1</sup> | -18.6(2)  |
| O(3) <sup>1</sup> | K(1) | O(1)              | C(1)              | -152.1(2) | O(3) <sup>1</sup> | K(1) | O(1)              | C(6) <sup>1</sup> | -17.2(2)  |
| O(1) <sup>1</sup> | K(1) | O(2)              | C(2)              | -159.5(2) | O(1) <sup>1</sup> | K(1) | O(2)              | C(3)              | -26.7(2)  |
| O(2)              | K(1) | O(1) <sup>1</sup> | C(1) <sup>1</sup> | 166.2(2)  | O(2)              | K(1) | O(1) <sup>1</sup> | C(6)              | 31.2(2)   |
| O(1) <sup>1</sup> | K(1) | O(2) <sup>1</sup> | C(2) <sup>1</sup> | -20.5(2)  | O(1) <sup>1</sup> | K(1) | O(2) <sup>1</sup> | C(3) <sup>1</sup> | -153.3(2) |
| O(2) <sup>1</sup> | K(1) | O(1) <sup>1</sup> | C(1) <sup>1</sup> | -13.8(2)  | O(2) <sup>1</sup> | K(1) | O(1) <sup>1</sup> | C(6)              | -148.8(2) |
| O(1) <sup>1</sup> | K(1) | O(3)              | C(4)              | 143.5(3)  | O(1) <sup>1</sup> | K(1) | O(3)              | C(5)              | 18.6(2)   |
| O(3)              | K(1) | O(1) <sup>1</sup> | C(1) <sup>1</sup> | 152.1(2)  | O(3)              | K(1) | O(1) <sup>1</sup> | C(6)              | 17.2(2)   |
| O(1) <sup>1</sup> | K(1) | O(3) <sup>1</sup> | C(4) <sup>1</sup> | 36.5(3)   | O(1) <sup>1</sup> | K(1) | O(3) <sup>1</sup> | C(5) <sup>1</sup> | 161.4(2)  |
| O(3) <sup>1</sup> | K(1) | O(1) <sup>1</sup> | C(1) <sup>1</sup> | -27.9(2)  | O(3) <sup>1</sup> | K(1) | O(1) <sup>1</sup> | C(6)              | -162.8(2) |
| O(2)              | K(1) | O(3)              | C(4)              | -22.6(2)  | O(2)              | K(1) | O(3)              | C(5)              | -147.5(2) |
| O(3)              | K(1) | O(2)              | C(2)              | -145.6(2) | O(3)              | K(1) | O(2)              | C(3)              | -12.7(2)  |
| O(2)              | K(1) | O(3) <sup>1</sup> | C(4) <sup>1</sup> | -157.4(2) | O(2)              | K(1) | O(3) <sup>1</sup> | C(5) <sup>1</sup> | -32.5(2)  |
| O(3) <sup>1</sup> | K(1) | O(2)              | C(2)              | 34.4(2)   | O(3) <sup>1</sup> | K(1) | O(2)              | C(3)              | 167.3(2)  |
| O(2) <sup>1</sup> | K(1) | O(3)              | C(4)              | 157.4(2)  | O(2) <sup>1</sup> | K(1) | O(3)              | C(5)              | 32.5(2)   |
| O(3)              | K(1) | O(2) <sup>1</sup> | C(2) <sup>1</sup> | -34.4(2)  | O(3)              | K(1) | O(2) <sup>1</sup> | C(3) <sup>1</sup> | -167.3(2) |

Table 8. Torsion angles ( $^{\circ}$ ) (continued)

| atom1             | atom2 | atom3             | atom4             | angle     | atom1             | atom2 | atom3             | atom4             | angle     |
|-------------------|-------|-------------------|-------------------|-----------|-------------------|-------|-------------------|-------------------|-----------|
| O(2) <sup>1</sup> | K(1)  | O(3) <sup>1</sup> | C(4) <sup>1</sup> | 22.6(2)   | O(2) <sup>1</sup> | K(1)  | O(3) <sup>1</sup> | C(5) <sup>1</sup> | 147.5(2)  |
| O(3) <sup>1</sup> | K(1)  | O(2) <sup>1</sup> | C(2) <sup>1</sup> | 145.6(2)  | O(3) <sup>1</sup> | K(1)  | O(2) <sup>1</sup> | C(3) <sup>1</sup> | 12.7(2)   |
| K(1)              | O(1)  | C(1)              | C(2)              | -45.1(3)  | K(1)              | O(1)  | C(6) <sup>1</sup> | C(5) <sup>1</sup> | 50.4(4)   |
| C(1)              | O(1)  | C(6) <sup>1</sup> | C(5) <sup>1</sup> | -173.1(3) | C(6) <sup>1</sup> | O(1)  | C(1)              | C(2)              | 179.5(3)  |
| K(1)              | O(2)  | C(2)              | C(1)              | -52.6(3)  | K(1)              | O(2)  | C(3)              | C(4)              | 45.8(3)   |
| C(2)              | O(2)  | C(3)              | C(4)              | 178.6(3)  | C(3)              | O(2)  | C(2)              | C(1)              | 174.1(3)  |
| K(1)              | O(3)  | C(4)              | C(3)              | 56.2(3)   | K(1)              | O(3)  | C(5)              | C(6)              | -52.0(3)  |
| C(4)              | O(3)  | C(5)              | C(6)              | -176.1(3) | C(5)              | O(3)  | C(4)              | C(3)              | -178.5(3) |
| O(1)              | C(1)  | C(2)              | O(2)              | 64.8(4)   | O(2)              | C(3)  | C(4)              | O(3)              | -69.8(4)  |
| O(3)              | C(5)  | C(6)              | O(1) <sup>1</sup> | 69.4(4)   |                   |       |                   |                   |           |

Symmetry Operators:

(1) -X+2,-Y+1,-Z+2

The sign is positive if when looking from atom 2 to atom 3 a clock-wise motion of atom 1 would superimpose it on atom 4.

Table 9. Distances beyond the asymmetric unit out to 3.60 Å

Table 10. Distances beyond the asymmetric unit out to 3.60 Å involving hydrogens

| atom  | atom              | distance | atom  | atom              | distance |
|-------|-------------------|----------|-------|-------------------|----------|
| I(1)  | H(2) <sup>1</sup> | 3.282    | I(1)  | H(6) <sup>2</sup> | 3.225    |
| I(1)  | H(6) <sup>3</sup> | 3.225    | Cl(1) | H(1) <sup>4</sup> | 2.853    |
| Cl(1) | H(2) <sup>1</sup> | 3.287    | Cl(1) | H(6) <sup>2</sup> | 3.358    |
| Cl(1) | H(8) <sup>2</sup> | 3.335    | Cl(1) | H(9) <sup>5</sup> | 3.097    |

|      |                     |       |      |                    |       |
|------|---------------------|-------|------|--------------------|-------|
| O(1) | H(1) <sup>4</sup>   | 3.362 | O(1) | H(4) <sup>4</sup>  | 3.314 |
| O(2) | H(5) <sup>6</sup>   | 2.999 | O(3) | H(3) <sup>2</sup>  | 2.818 |
| O(3) | H(6) <sup>2</sup>   | 3.319 | C(1) | H(4) <sup>4</sup>  | 3.572 |
| C(1) | H(8) <sup>6</sup>   | 3.381 | C(2) | H(5) <sup>6</sup>  | 3.558 |
| C(2) | H(8) <sup>6</sup>   | 3.535 | C(2) | H(10) <sup>7</sup> | 3.517 |
| C(2) | H(11) <sup>7</sup>  | 3.388 | C(3) | H(5) <sup>6</sup>  | 3.178 |
| C(4) | H(2) <sup>2</sup>   | 3.512 | C(4) | H(3) <sup>2</sup>  | 3.327 |
| C(4) | H(5) <sup>6</sup>   | 3.491 | C(4) | H(11) <sup>8</sup> | 3.108 |
| C(5) | H(3) <sup>2</sup>   | 3.160 | C(5) | H(11) <sup>8</sup> | 3.558 |
| C(5) | H(12) <sup>8</sup>  | 3.404 | C(6) | H(3) <sup>2</sup>  | 3.586 |
| C(6) | H(4) <sup>9</sup>   | 3.200 | C(6) | H(7) <sup>10</sup> | 3.363 |
| C(6) | H(10) <sup>10</sup> | 3.254 | H(1) | Cl(1) <sup>4</sup> | 2.853 |
| H(1) | O(1) <sup>4</sup>   | 3.362 | H(1) | H(1) <sup>4</sup>  | 3.484 |
| H(1) | H(4) <sup>4</sup>   | 2.940 | H(1) | H(8) <sup>6</sup>  | 3.529 |
| H(1) | H(8) <sup>11</sup>  | 3.579 | H(1) | H(9) <sup>6</sup>  | 3.478 |
| H(1) | H(10) <sup>7</sup>  | 3.502 | H(2) | I(1) <sup>12</sup> | 3.282 |
| H(2) | Cl(1) <sup>12</sup> | 3.287 | H(2) | C(4) <sup>6</sup>  | 3.512 |
| H(2) | H(5) <sup>6</sup>   | 3.464 | H(2) | H(8) <sup>6</sup>  | 2.712 |
| H(3) | O(3) <sup>6</sup>   | 2.818 | H(3) | C(4) <sup>6</sup>  | 3.327 |
| H(3) | C(5) <sup>6</sup>   | 3.160 | H(3) | C(6) <sup>6</sup>  | 3.586 |
| H(3) | H(5) <sup>6</sup>   | 3.235 | H(3) | H(8) <sup>6</sup>  | 3.006 |
| H(3) | H(9) <sup>6</sup>   | 2.767 | H(3) | H(10) <sup>7</sup> | 3.018 |
| H(3) | H(11) <sup>7</sup>  | 3.475 | H(3) | H(12) <sup>6</sup> | 3.050 |
| H(4) | O(1) <sup>4</sup>   | 3.314 | H(4) | C(1) <sup>4</sup>  | 3.572 |
| H(4) | C(6) <sup>7</sup>   | 3.200 | H(4) | H(1) <sup>4</sup>  | 2.940 |

|      |                    |       |      |                    |             |
|------|--------------------|-------|------|--------------------|-------------|
| H(4) | H(7) <sup>2</sup>  | 3.293 | H(4) | H(10) <sup>7</sup> | 3.211       |
| H(4) | H(11) <sup>7</sup> | 2.521 | H(5) | O(2) <sup>2</sup>  | 2.999       |
| H(5) | C(2) <sup>2</sup>  | 3.558 | H(5) | C(3) <sup>2</sup>  | 3.178       |
| H(5) | C(4) <sup>2</sup>  | 3.491 | H(5) | H(2) <sup>2</sup>  | 3.464       |
| H(5) | H(3) <sup>2</sup>  | 3.235 | H(5) | H(6) <sup>2</sup>  | 2.734       |
| H(5) | H(7) <sup>2</sup>  | 2.921 | H(6) | I(1) <sup>6</sup>  | 3.225       |
| H(6) | Cl(1) <sup>6</sup> | 3.358 | H(6) | O(3) <sup>6</sup>  | 3.319       |
| H(6) | H(5) <sup>6</sup>  | 2.734 | H(7) | C(6) <sup>8</sup>  | 3.363 Table |

10. Distances beyond the asymmetric unit out to 3.60 Å involving hydrogens (continued)

| atom  | atom                | distance | atom  | atom               | distance |
|-------|---------------------|----------|-------|--------------------|----------|
| H(7)  | H(4) <sup>6</sup>   | 3.293    | H(7)  | H(5) <sup>6</sup>  | 2.921    |
| H(7)  | H(9) <sup>8</sup>   | 3.565    | H(7)  | H(11) <sup>8</sup> | 2.494    |
| H(7)  | H(12) <sup>8</sup>  | 3.526    | H(8)  | Cl(1) <sup>6</sup> | 3.335    |
| H(8)  | C(1) <sup>2</sup>   | 3.381    | H(8)  | C(2) <sup>2</sup>  | 3.535    |
| H(8)  | H(1) <sup>2</sup>   | 3.529    | H(8)  | H(1) <sup>13</sup> | 3.579    |
| H(8)  | H(2) <sup>2</sup>   | 2.712    | H(8)  | H(3) <sup>2</sup>  | 3.006    |
| H(8)  | H(11) <sup>8</sup>  | 2.860    | H(8)  | H(12) <sup>8</sup> | 3.589    |
| H(9)  | Cl(1) <sup>14</sup> | 3.097    | H(9)  | H(1) <sup>2</sup>  | 3.478    |
| H(9)  | H(3) <sup>2</sup>   | 2.767    | H(9)  | H(7) <sup>10</sup> | 3.565    |
| H(9)  | H(10) <sup>10</sup> | 3.099    | H(9)  | H(11) <sup>8</sup> | 3.429    |
| H(9)  | H(12) <sup>8</sup>  | 3.067    | H(10) | C(2) <sup>9</sup>  | 3.517    |
| H(10) | C(6) <sup>8</sup>   | 3.254    | H(10) | H(1) <sup>9</sup>  | 3.502    |
| H(10) | H(3) <sup>9</sup>   | 3.018    | H(10) | H(4) <sup>9</sup>  | 3.211    |
| H(10) | H(9) <sup>8</sup>   | 3.099    | H(10) | H(11) <sup>8</sup> | 2.973    |
| H(10) | H(12) <sup>8</sup>  | 2.828    | H(11) | C(2) <sup>9</sup>  | 3.388    |

|       |                     |       |       |                      |       |
|-------|---------------------|-------|-------|----------------------|-------|
| H(11) | C(4) <sup>10)</sup> | 3.108 | H(11) | C(5) <sup>10)</sup>  | 3.558 |
| H(11) | H(3) <sup>9)</sup>  | 3.475 | H(11) | H(4) <sup>9)</sup>   | 2.521 |
| H(11) | H(7) <sup>10)</sup> | 2.494 | H(11) | H(8) <sup>10)</sup>  | 2.860 |
| H(11) | H(9) <sup>10)</sup> | 3.429 | H(11) | H(10) <sup>10)</sup> | 2.973 |
| H(12) | C(5) <sup>10)</sup> | 3.404 | H(12) | H(3) <sup>2)</sup>   | 3.050 |
| H(12) | H(7) <sup>10)</sup> | 3.526 | H(12) | H(8) <sup>10)</sup>  | 3.589 |
| H(12) | H(9) <sup>10)</sup> | 3.067 | H(12) | H(10) <sup>10)</sup> | 2.828 |

Symmetry Operators:

- (1) X,Y+1,Z                      (2) -X+1/2+1,Y+1/2,-Z+1/2+1  
(3) X+1/2,-Y+1/2+1,Z+1/2                      (4) -X+1,-Y+1,-Z+2  
(5) X+1/2-1,-Y+1/2+1,Z+1/2                      (6) -X+1/2+1,Y+1/2-1,-Z+1/2+1  
(7) X-1,Y,Z                      (8) -X+1/2+2,Y+1/2-1,-Z+1/2+1  
(9) X+1,Y,Z                      (10) -X+1/2+2,Y+1/2,-Z+1/2+1  
(11) X+1/2-1,-Y+1/2,Z+1/2                      (12) X,Y-1,Z  
(13) X+1/2,-Y+1/2,Z+1/2-1                      (14) X+1/2,-Y+1/2+1,Z+1/2-1

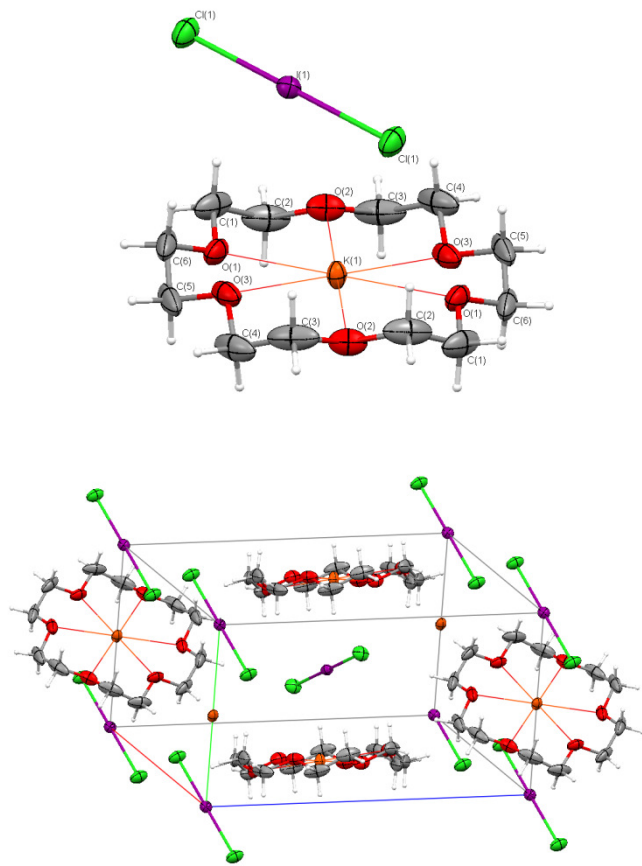



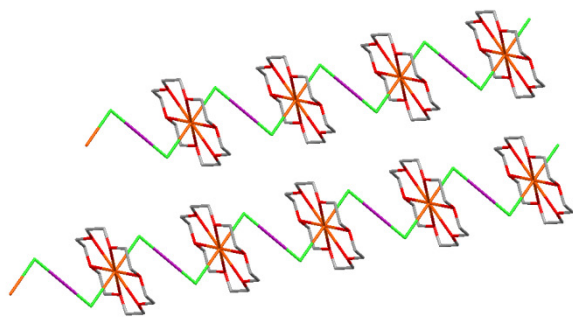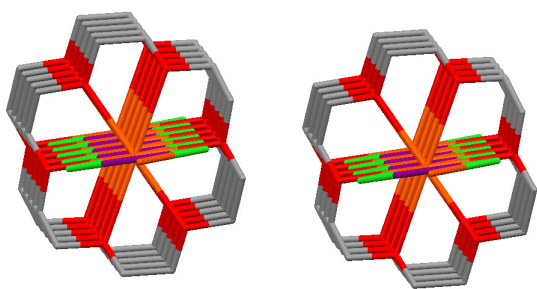

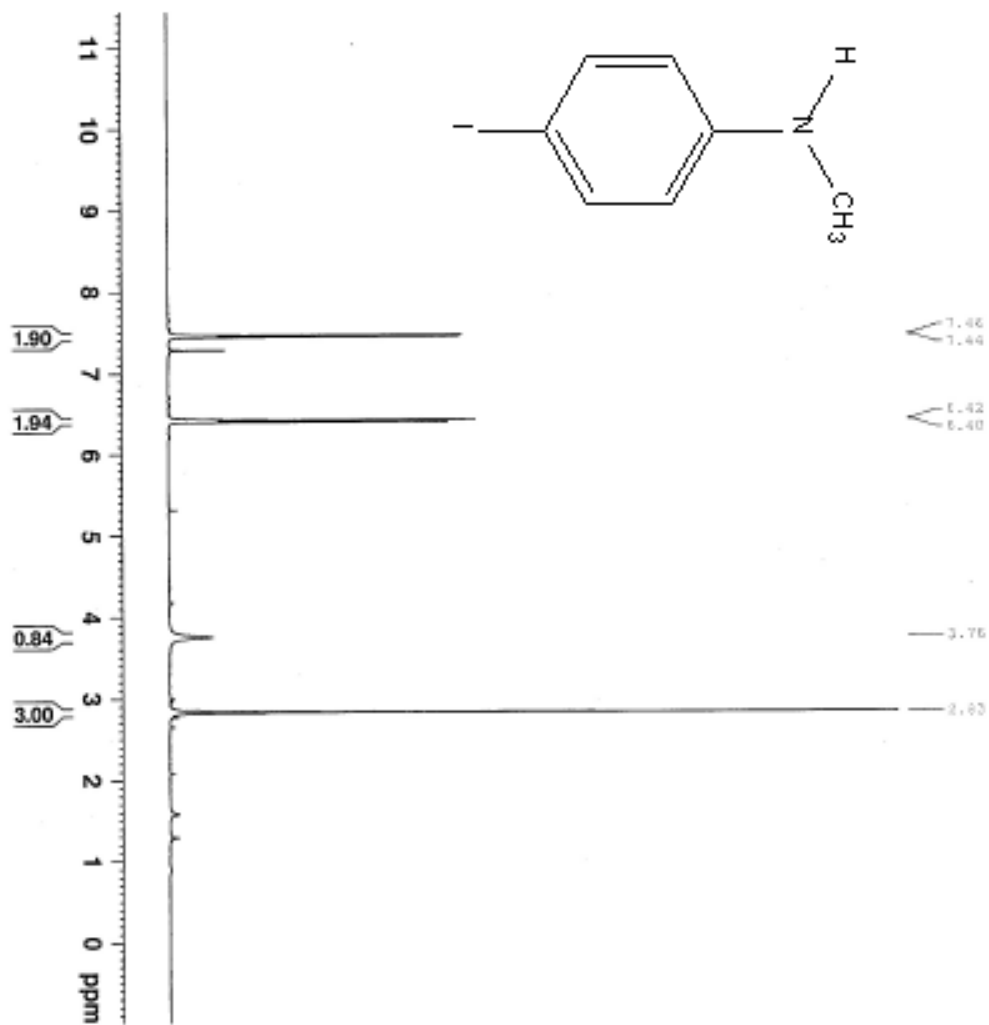

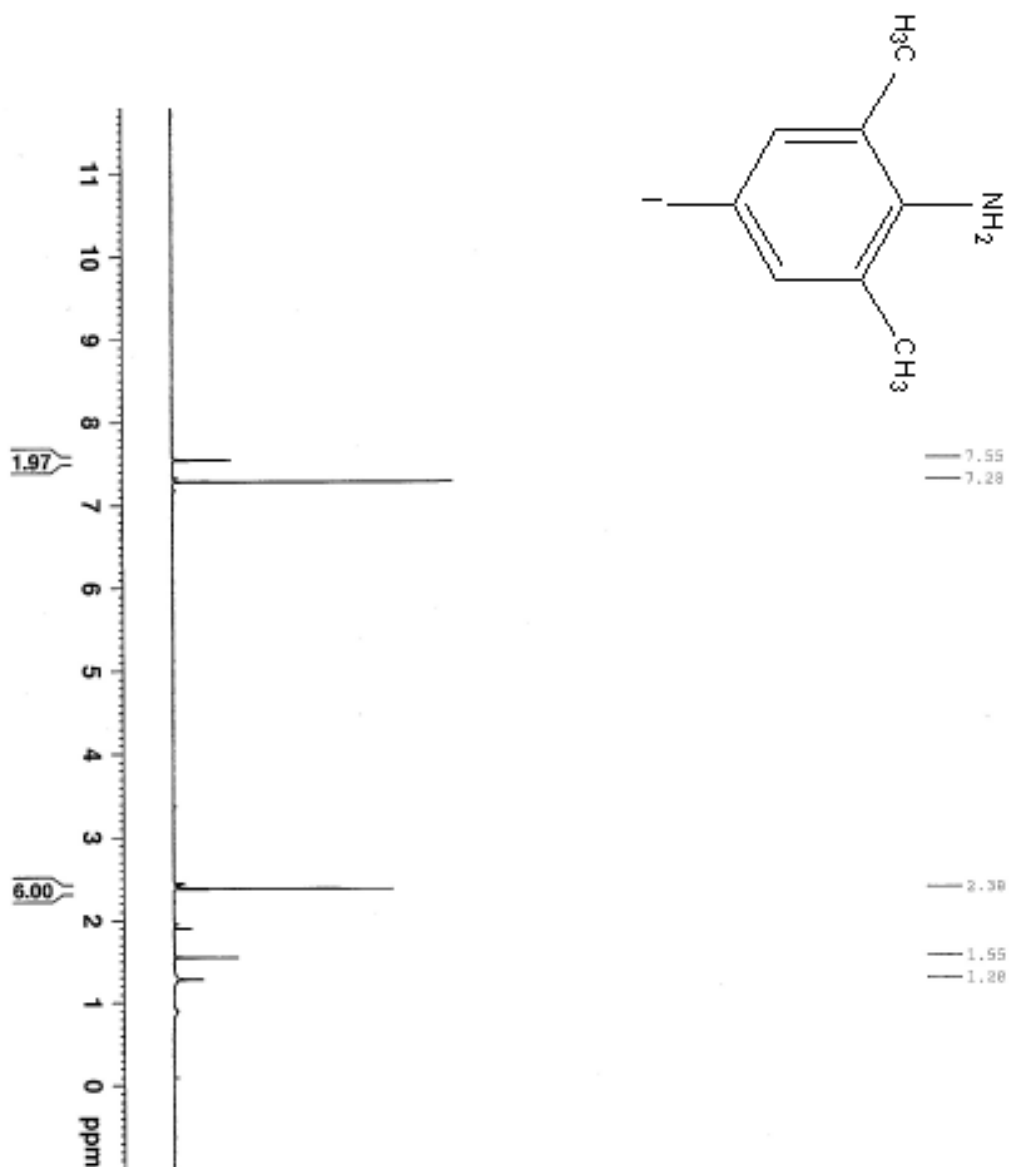

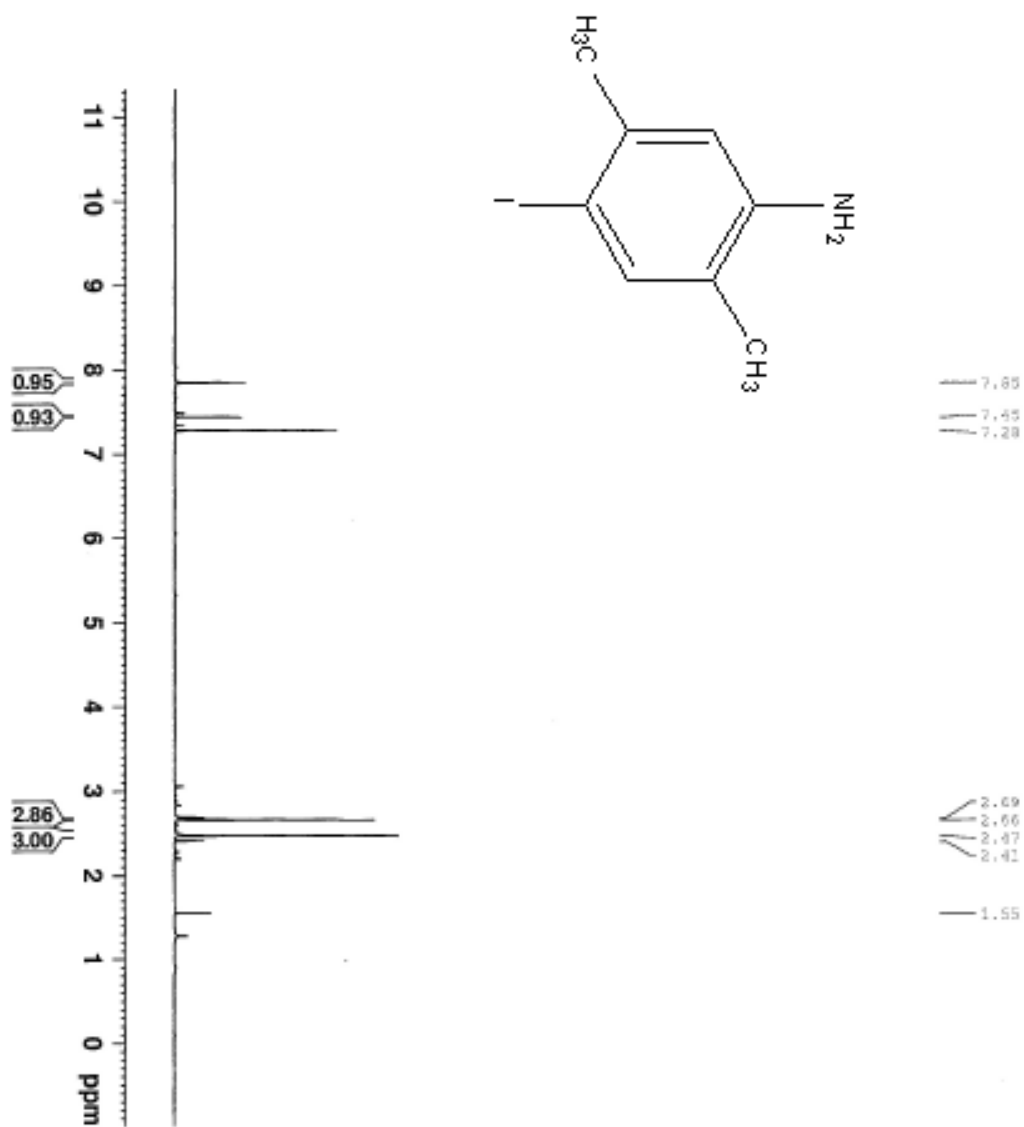

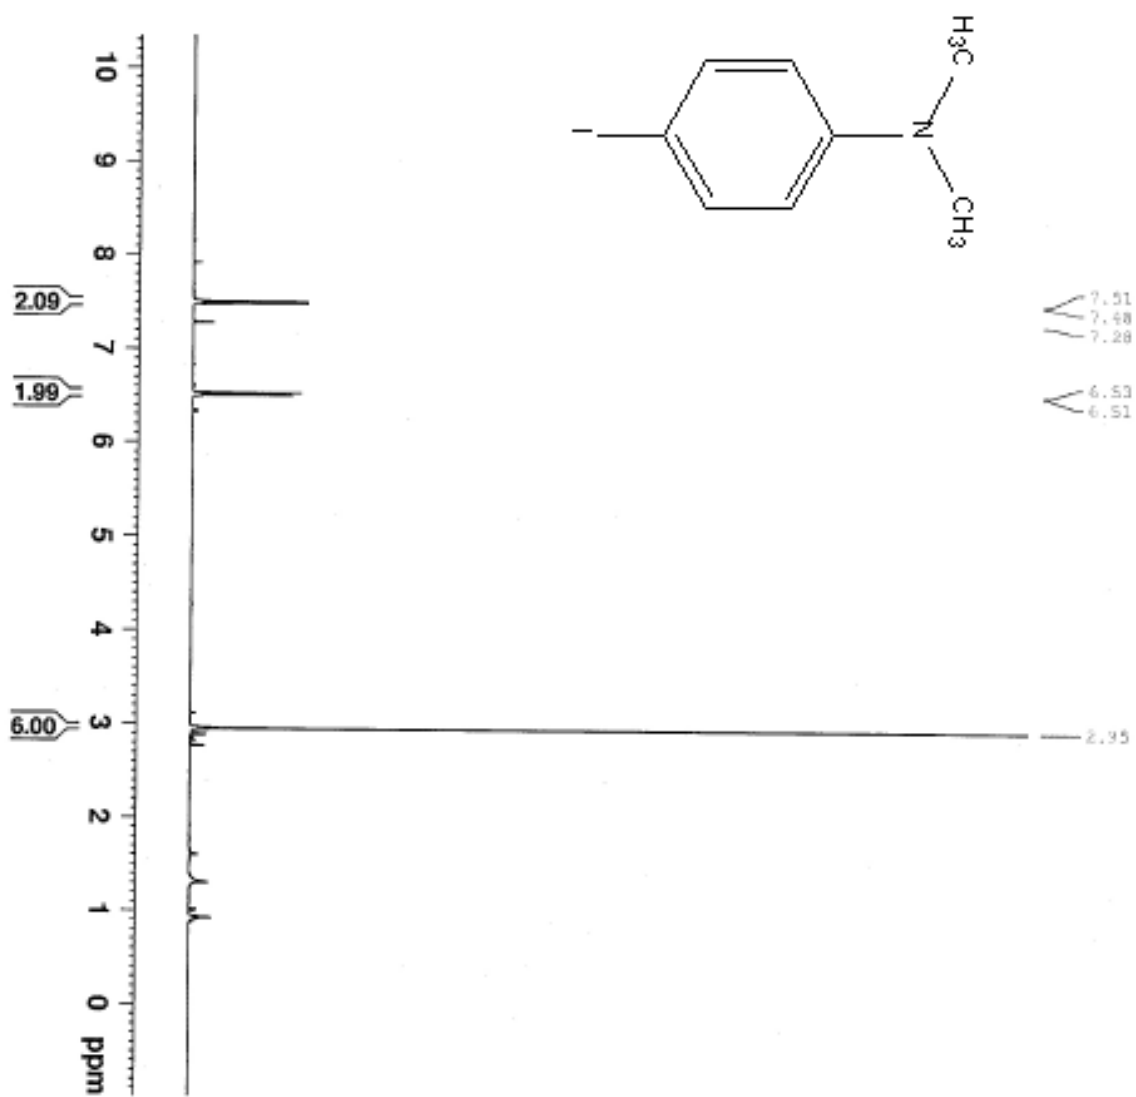

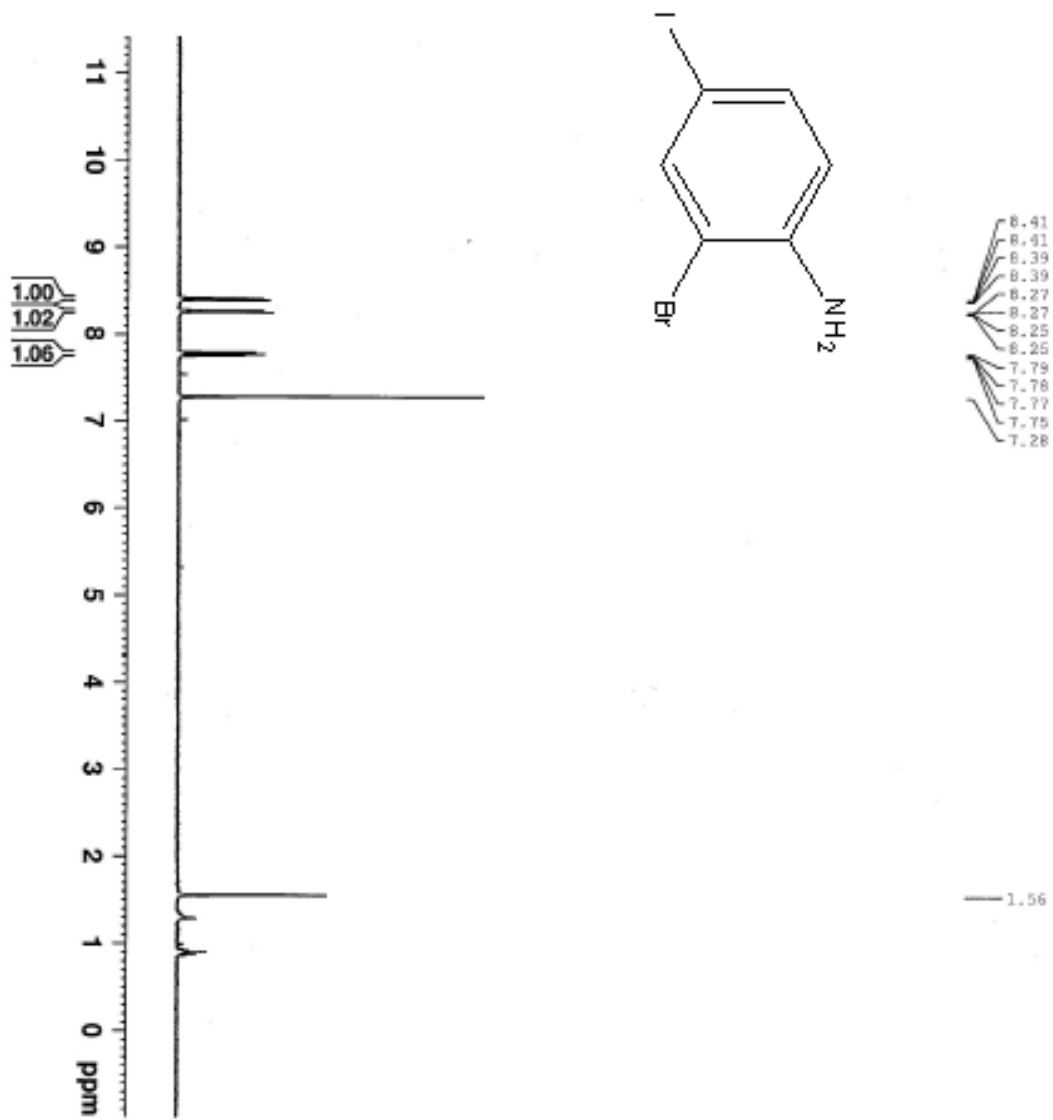

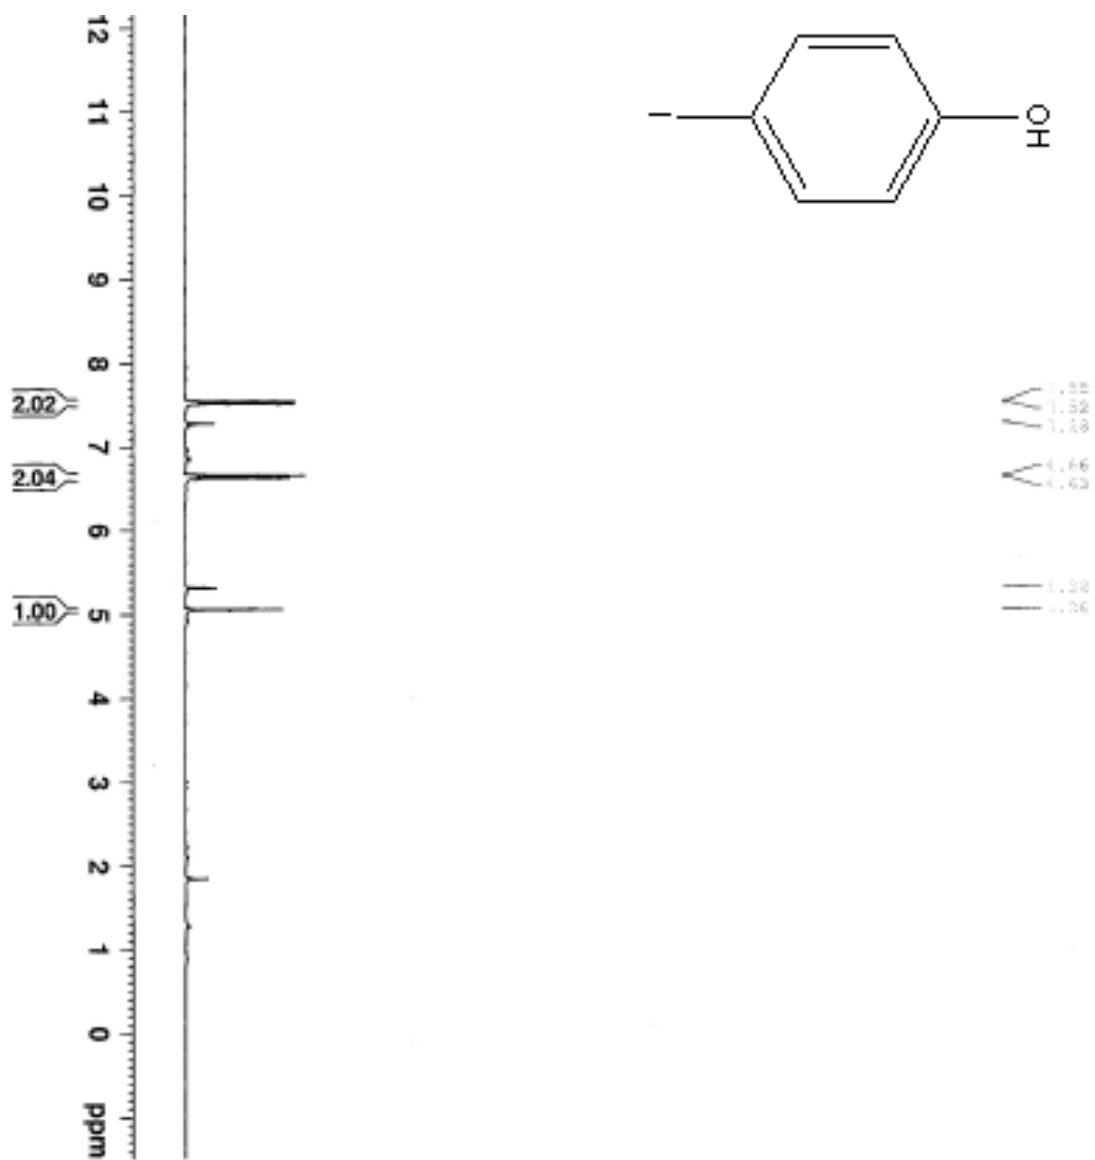

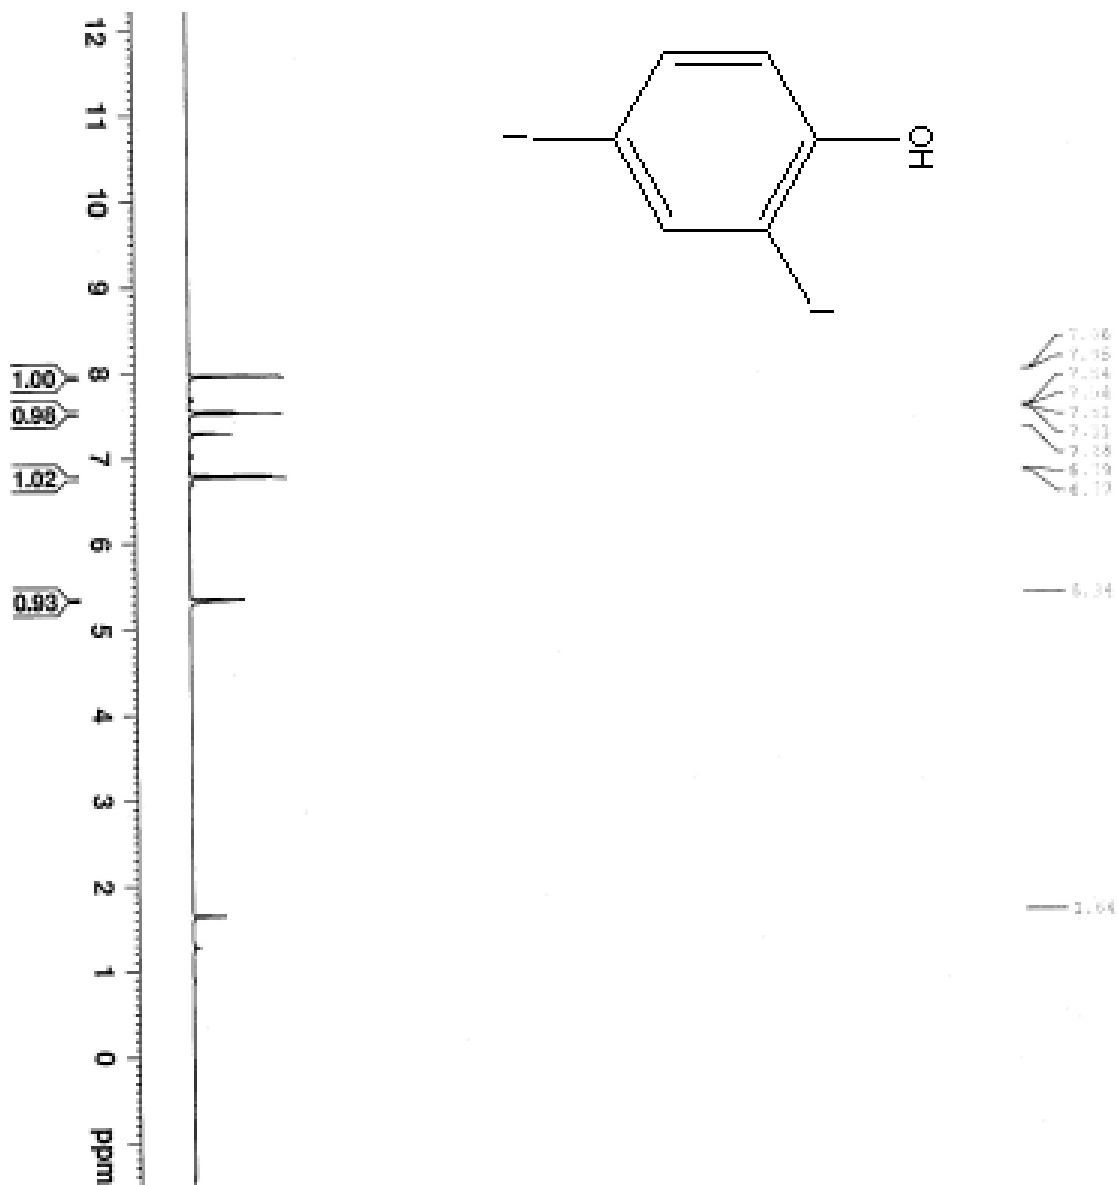



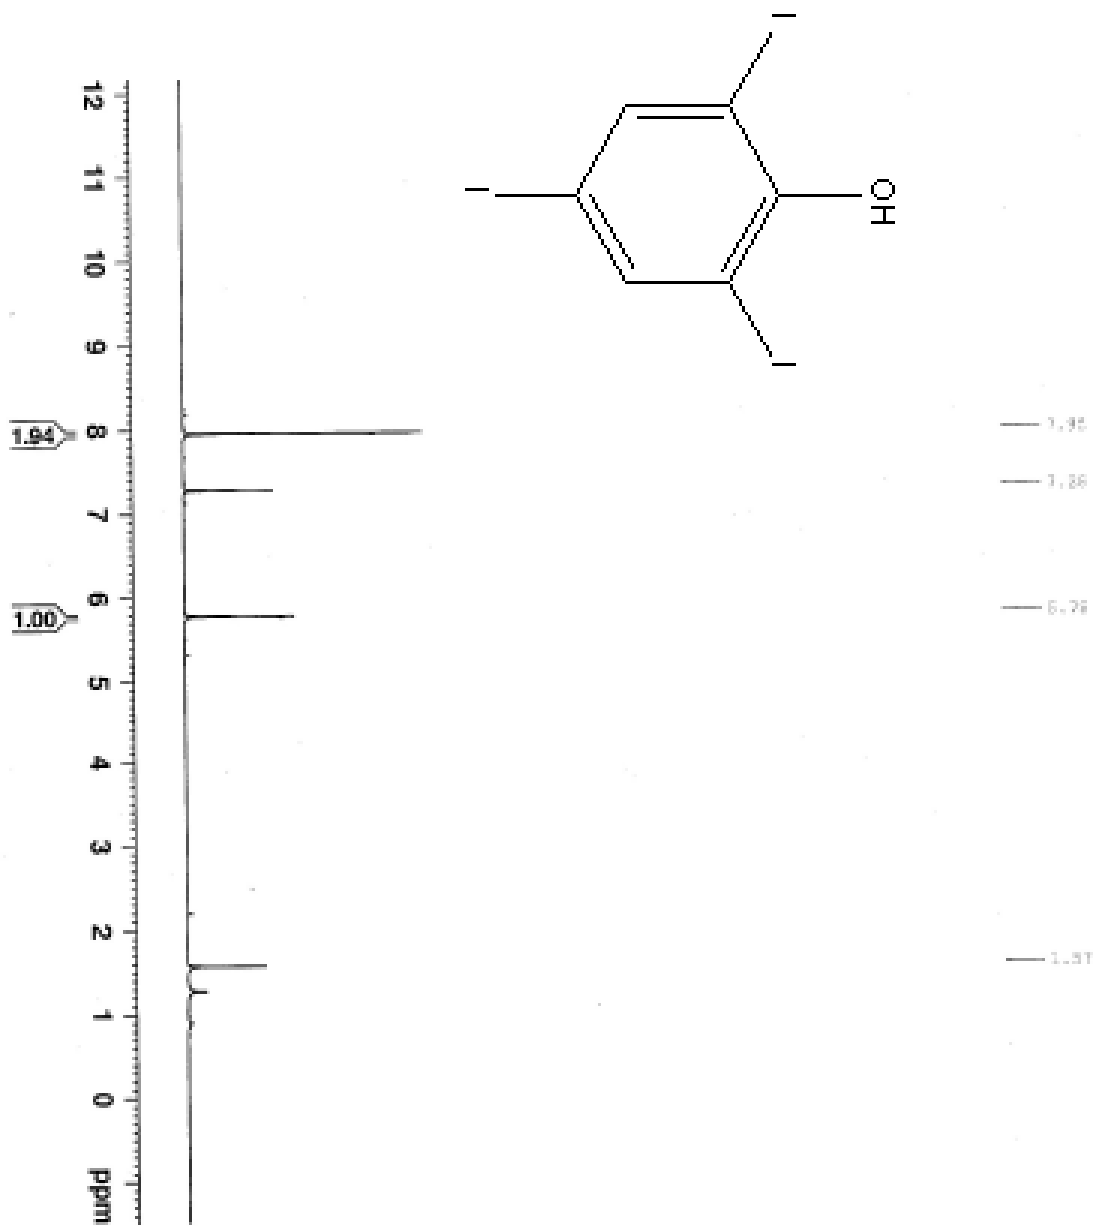

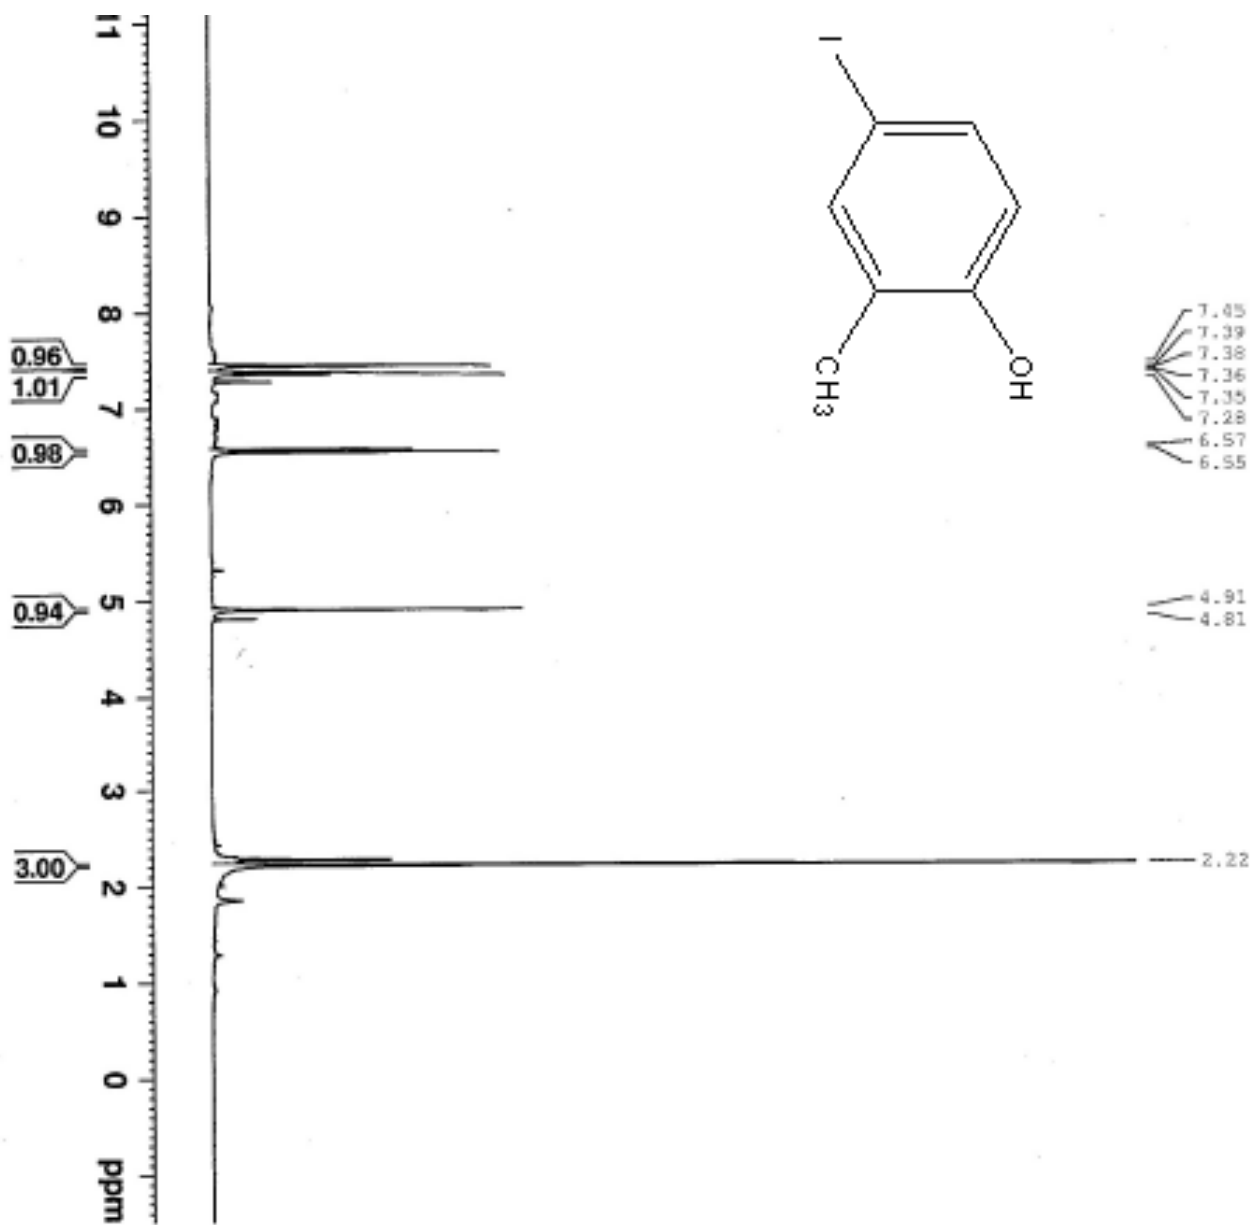

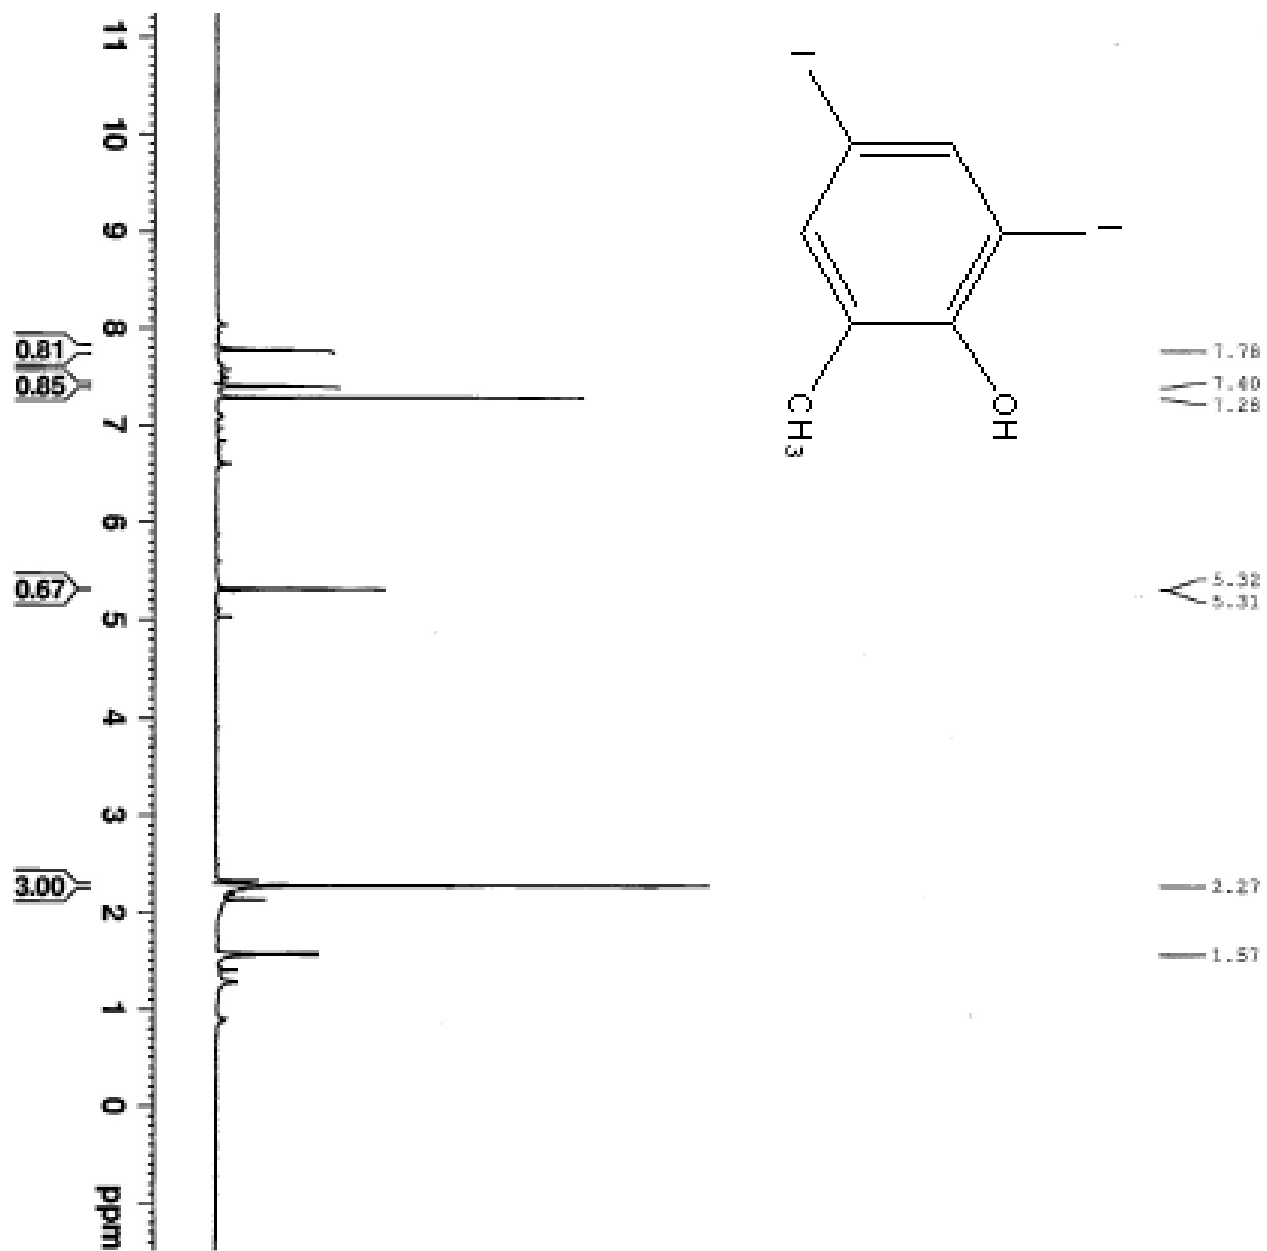

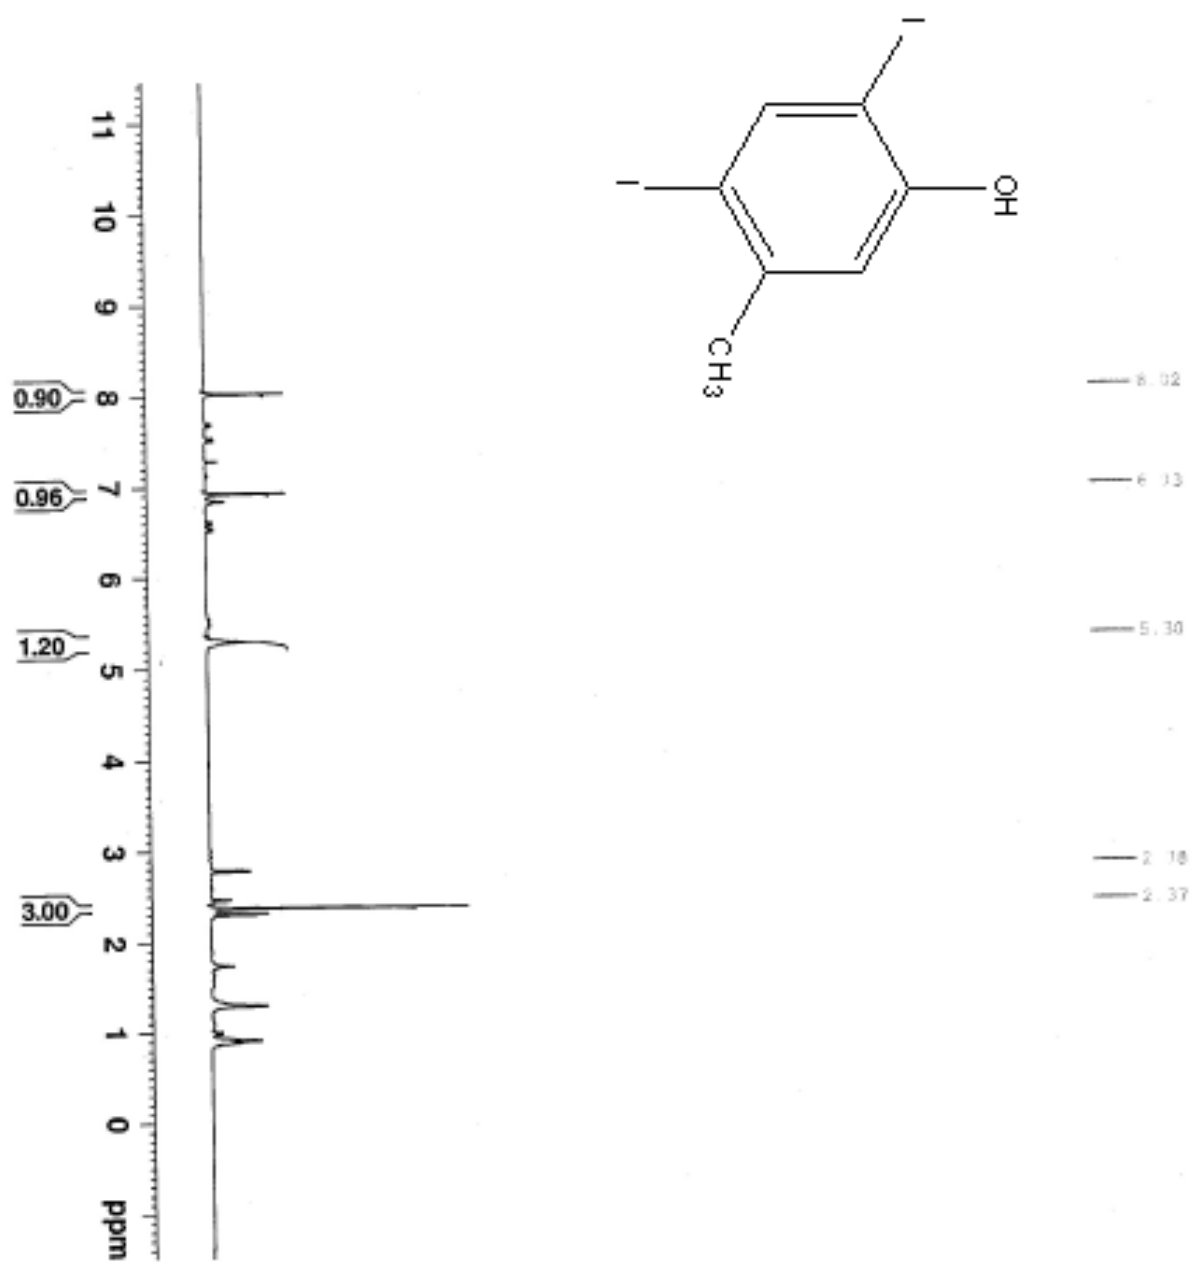

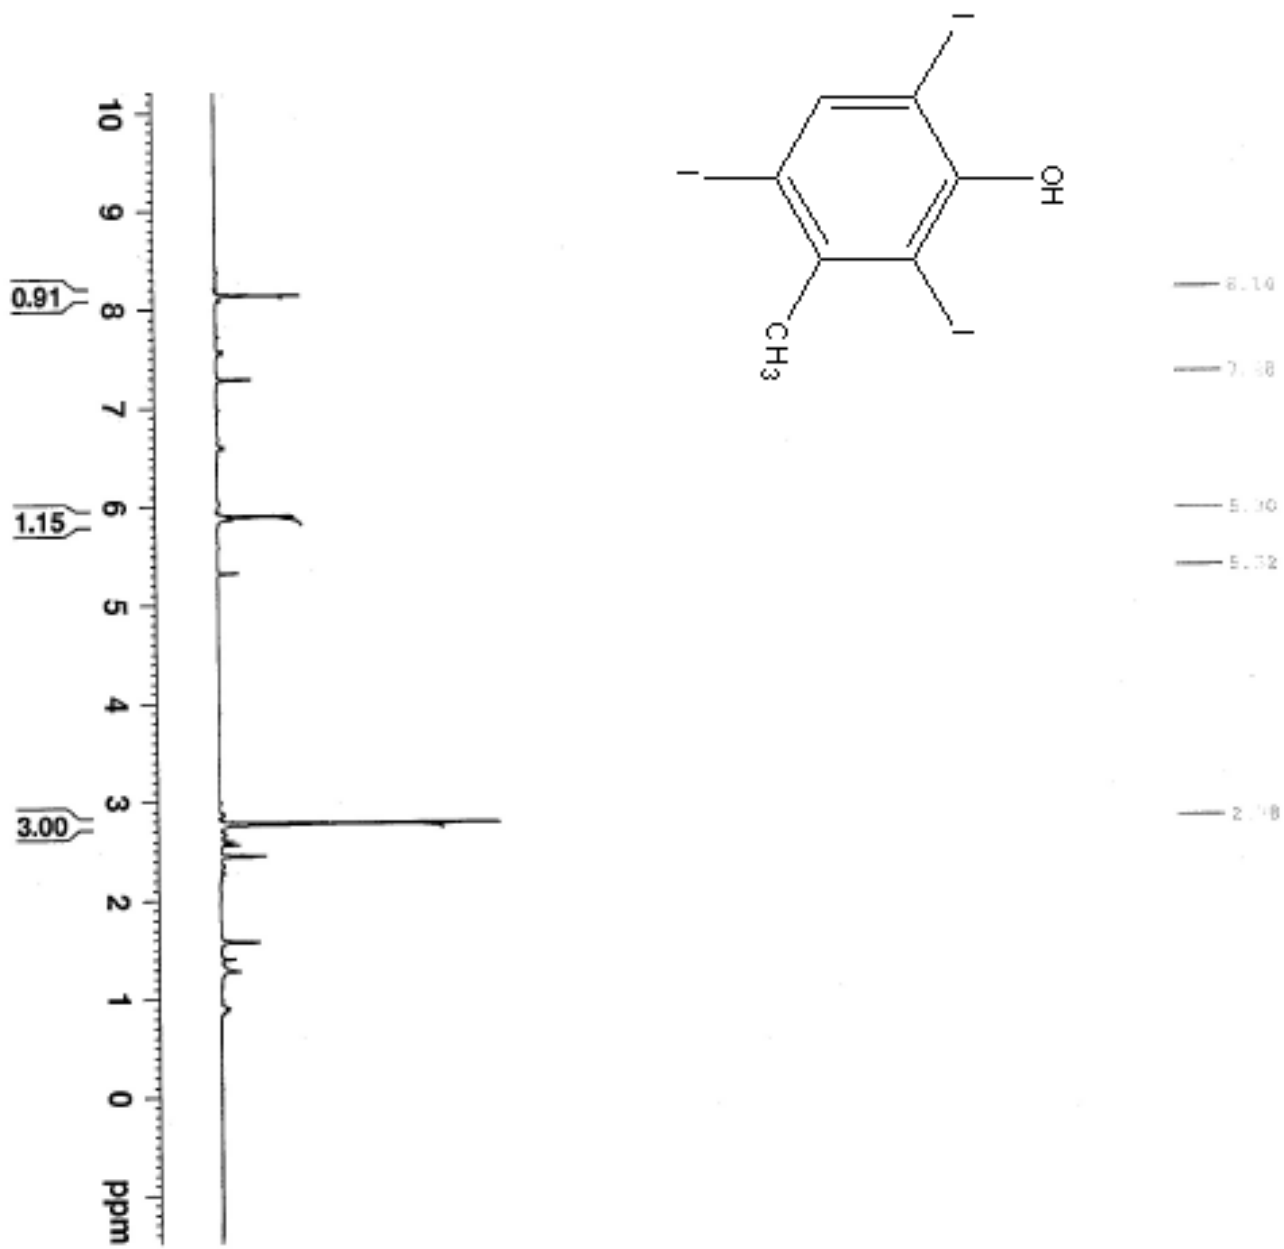

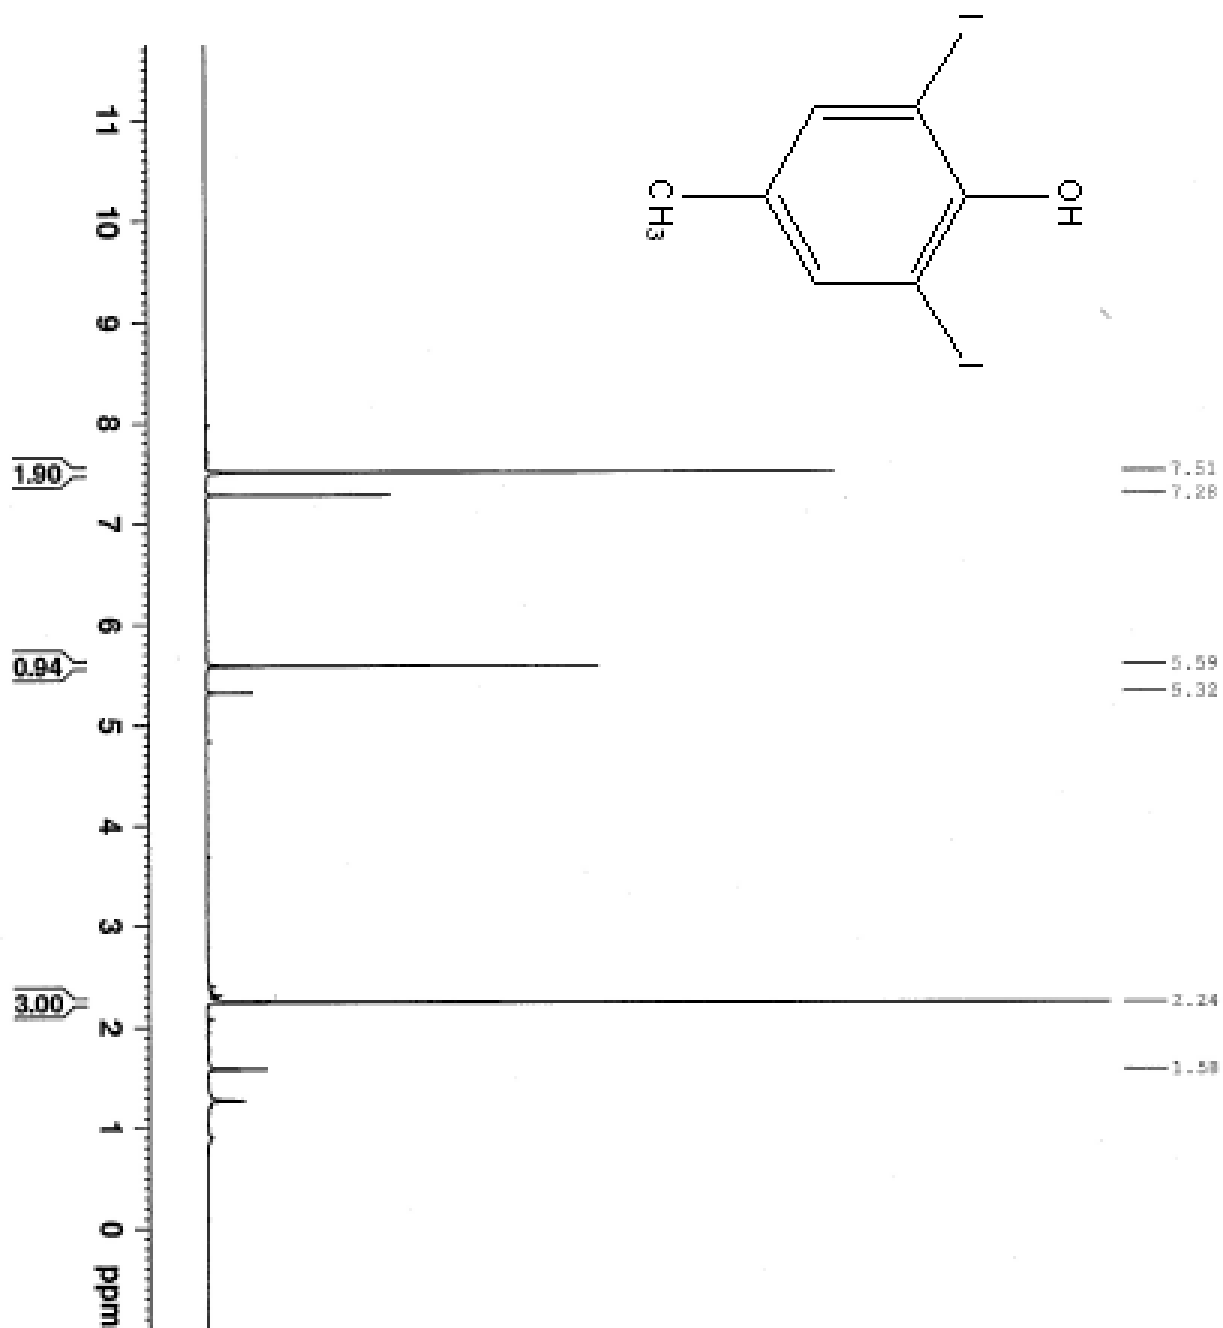

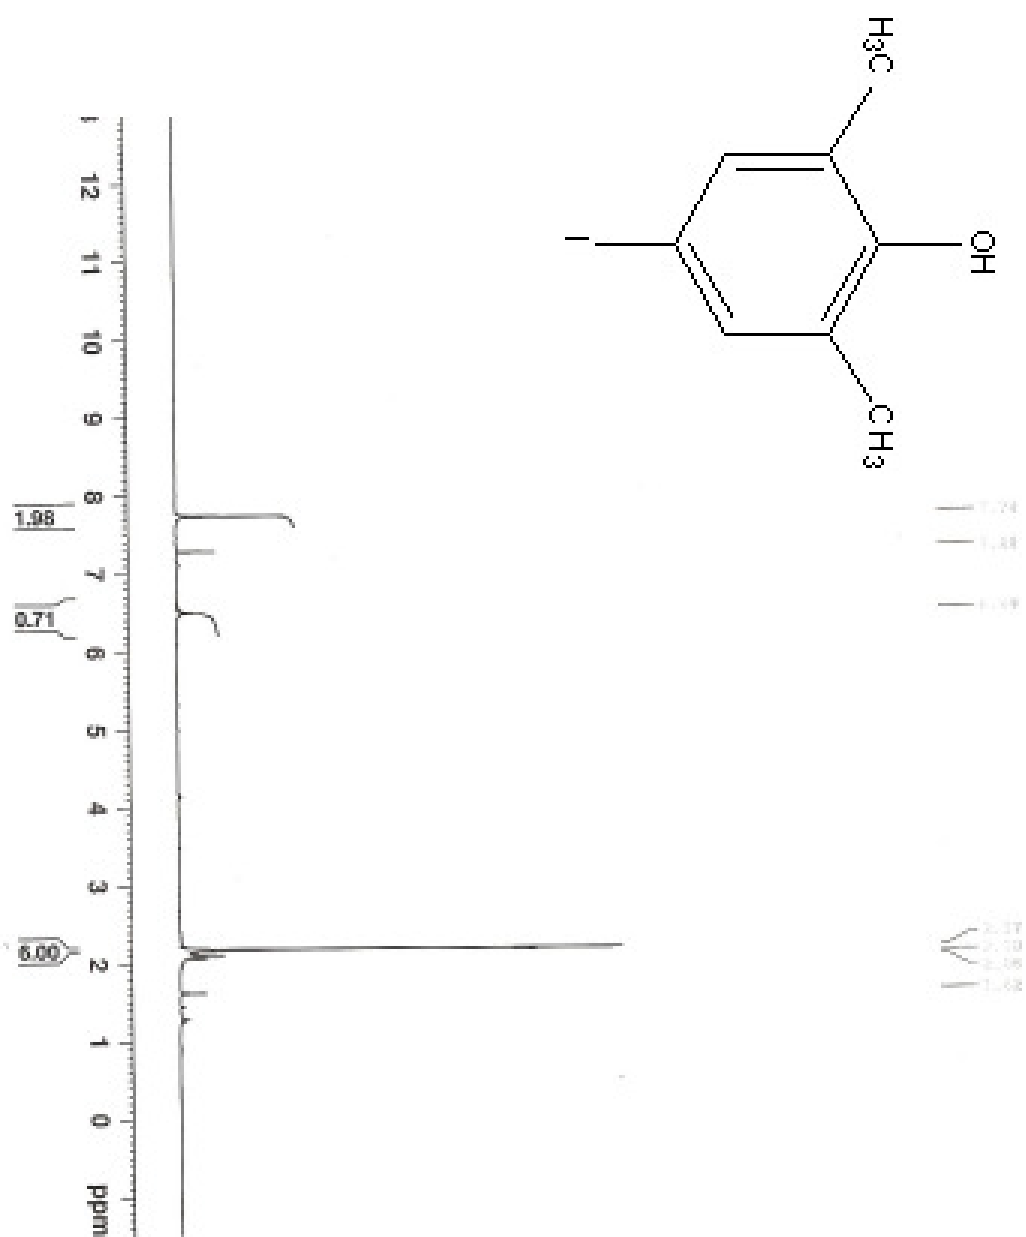

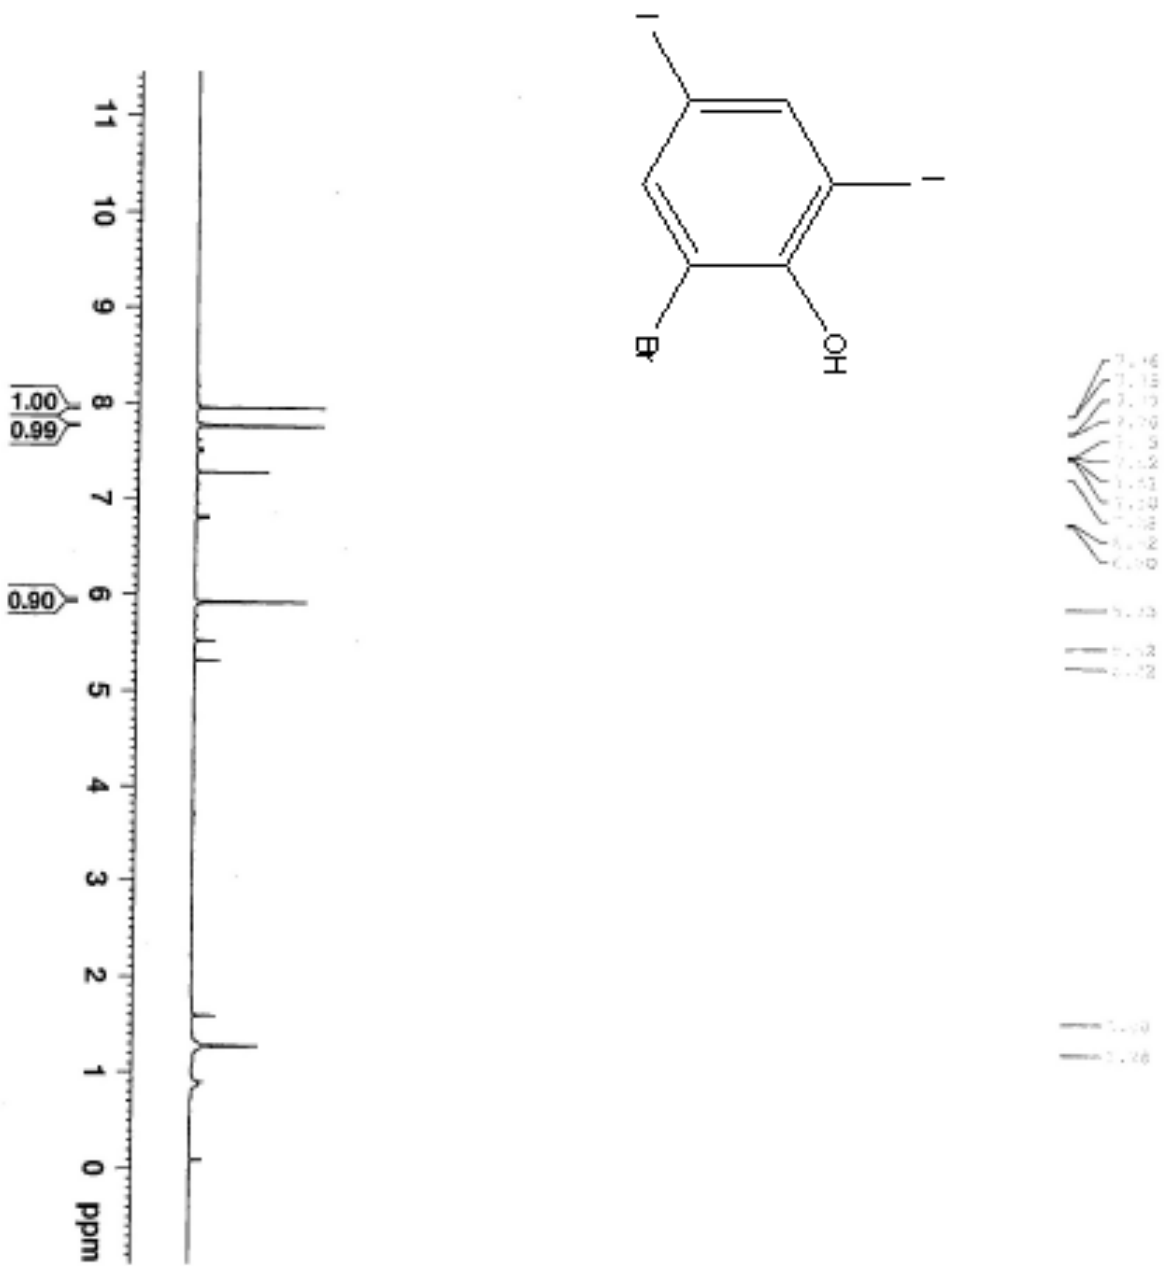



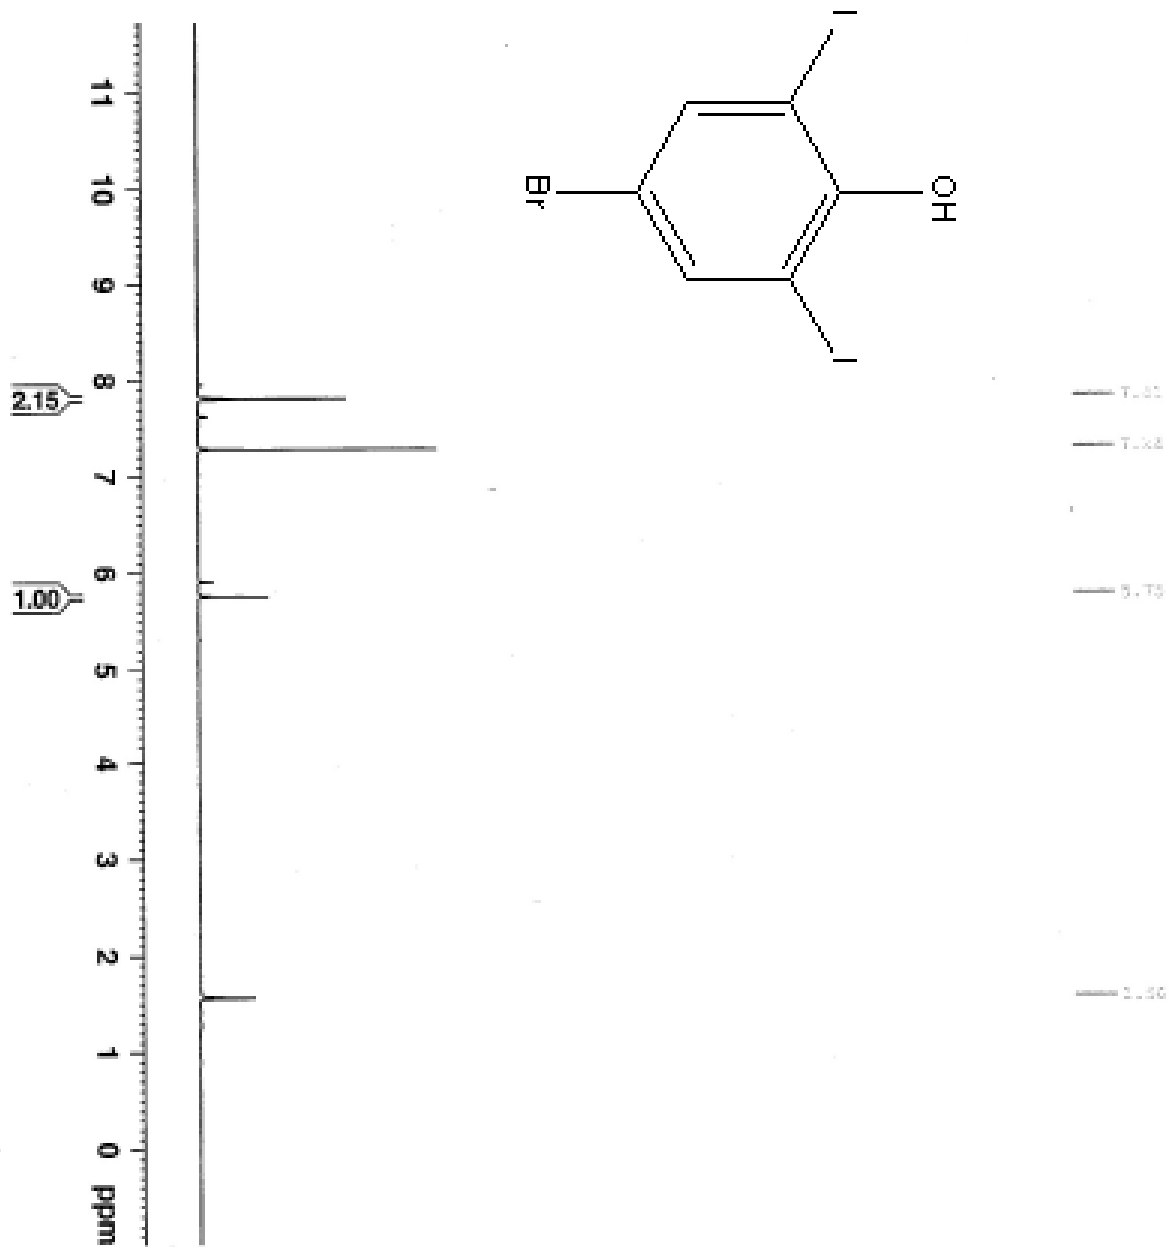

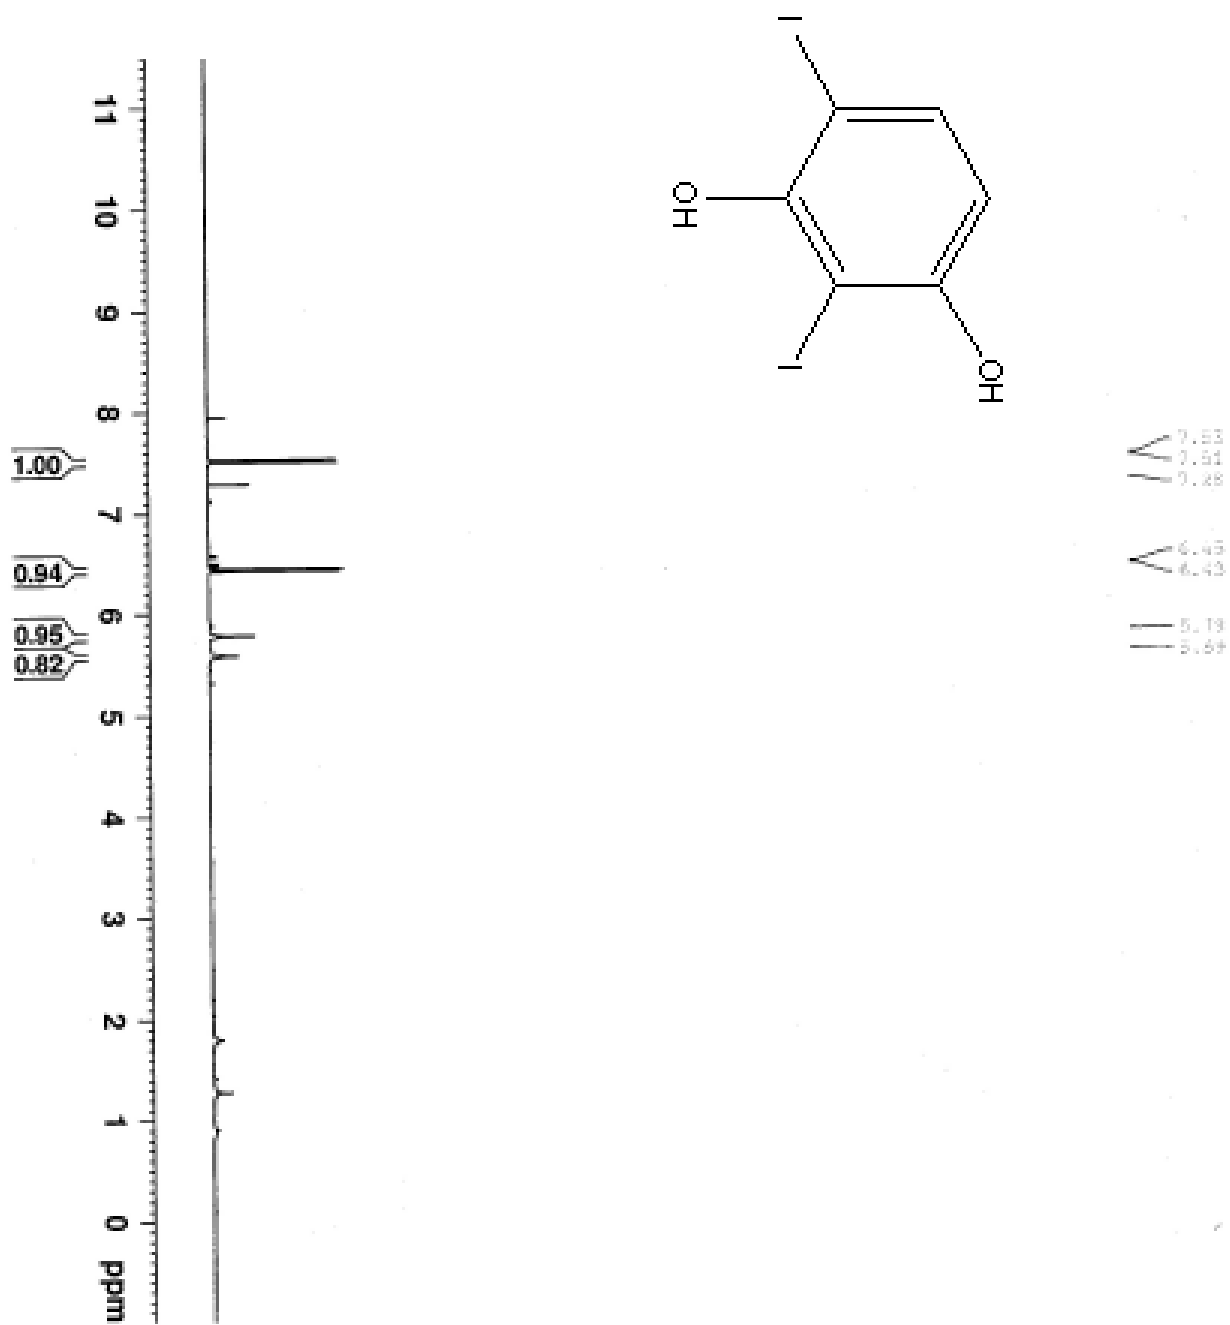

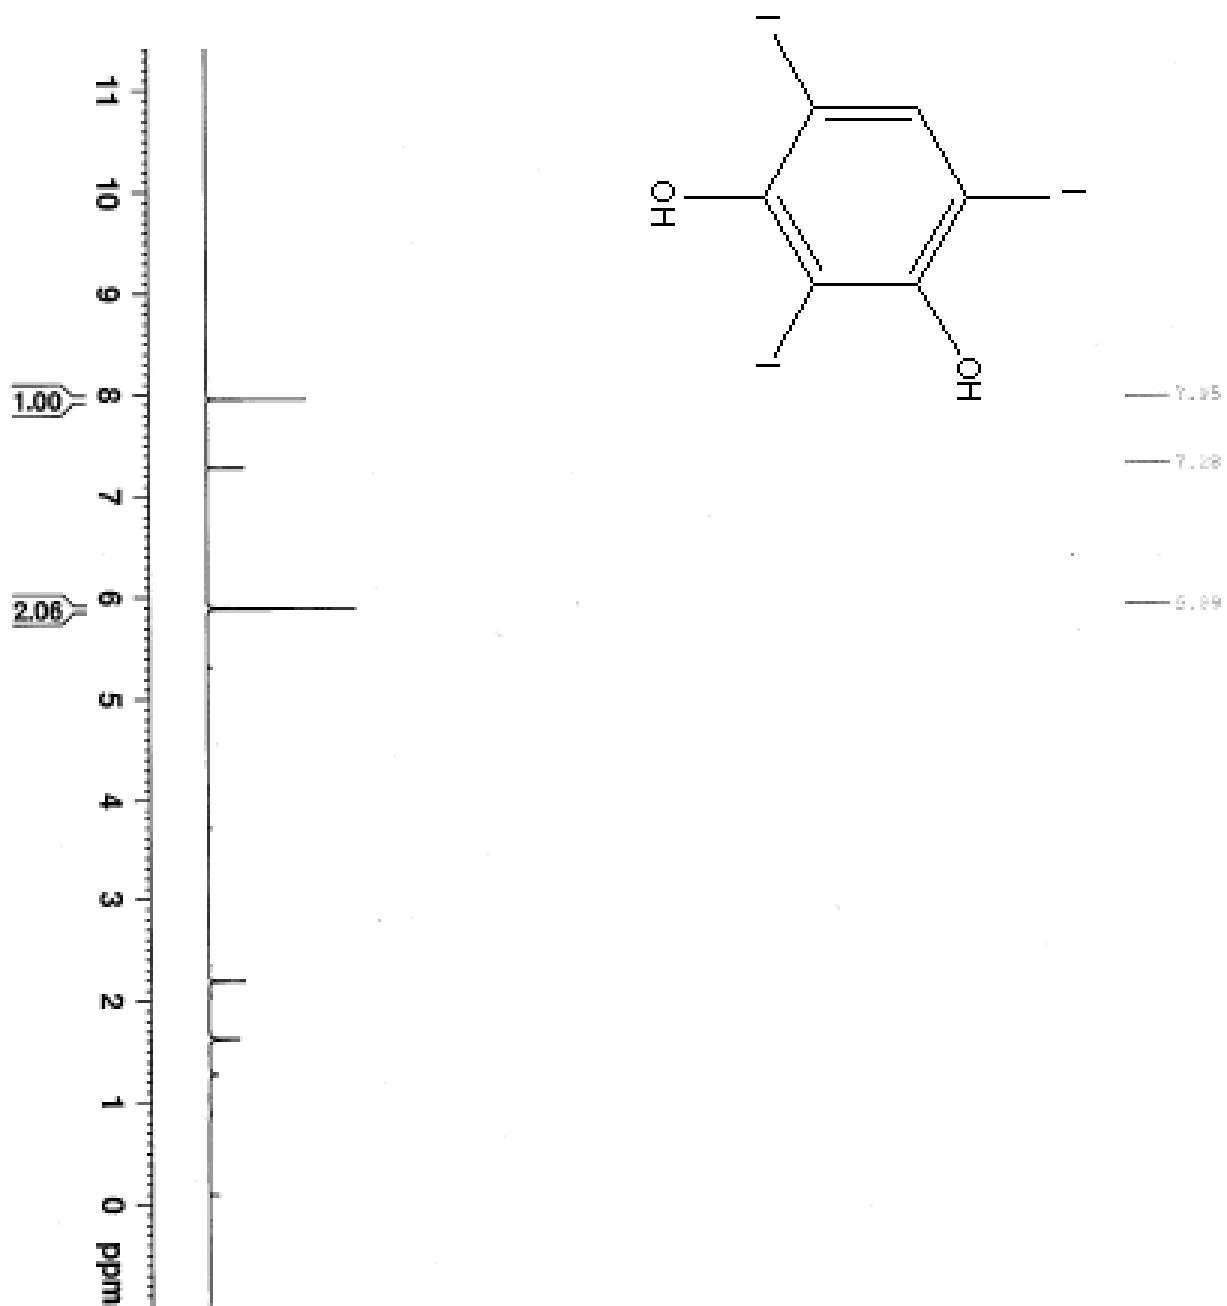

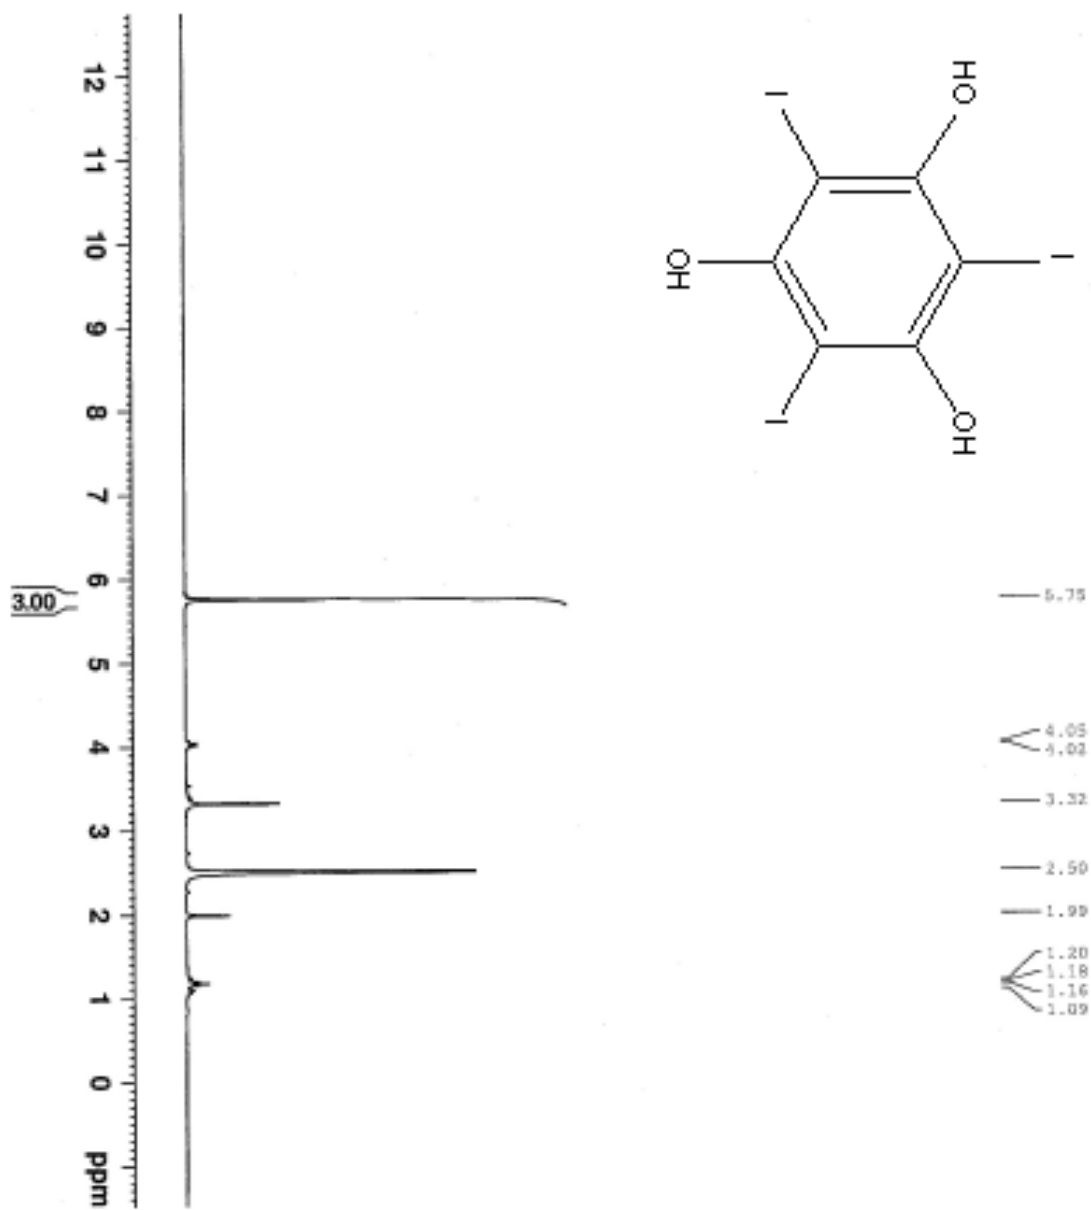

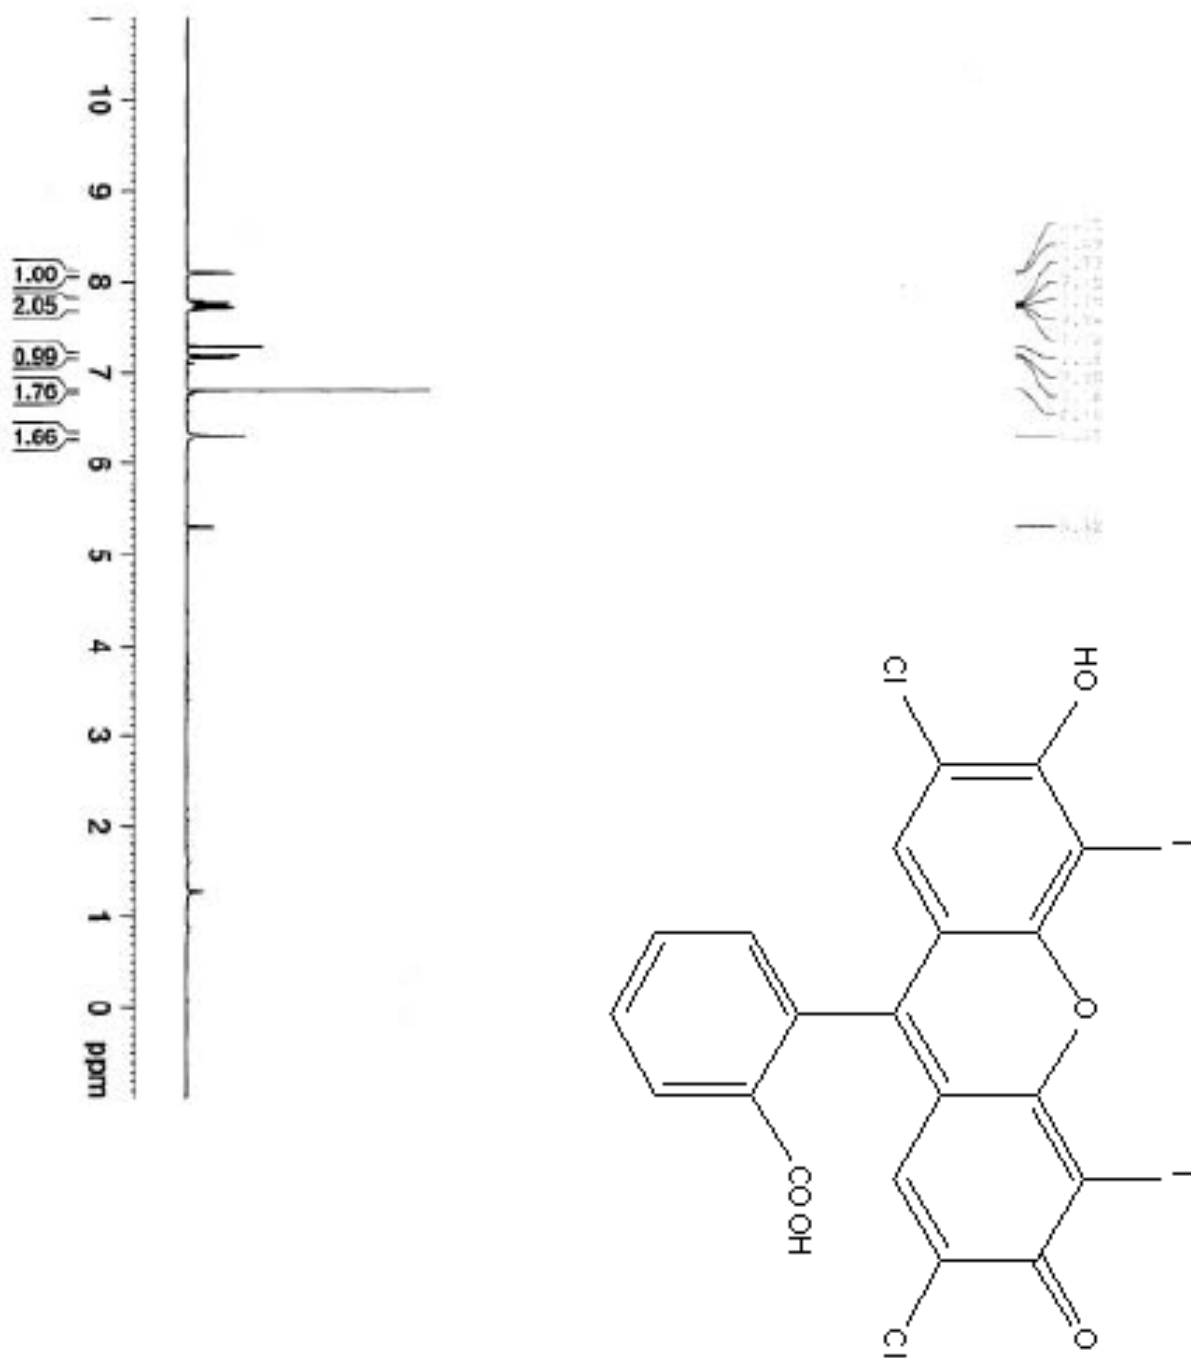

Supplement: c0ob00926a.pdf [file c0ob00926a.pdf]
